# Supplementary material for: The mean reticulocyte volume is a valuable index in early diagnosis of cancer-related anemia
Source: PeerJ. 2024 Feb 29;12:e17063. doi: 10.7717/peerj.17063 (PMC10909343; doi:10.7717/peerj.17063)
Supplement: Supplemental Information 1 [file peerj-12-17063-s001.xlsx]

## Sheet:  Data
sequence	cancer type	SEX(M:male; F:female)	Sex（2:Male, 1:Female）	group（1：anemia；(0:non-anemia）-HB	HB	age	Height	Mass	BMI	SBP	DBP	ALB	TP	Fbg	tbil	scre	CHOL	TG	ft3	ft4	TSH	WBC	RBC	Gender（2:Male, 1:Female）	HB	HGB-cutoff(0>C,1<C;Male:109.5, Female:109.5)	Hb:Q1-Q4(M：P25-104.25,P50-122.0,P75-141.75;F：P25-105.0,P50-112.0,P75-125.0)	HCT	MCV	MCH	MCHC	sex（2male，1female）	MCH-Cutoff (M:31.85,F30.75;0>C,1<C)	MCV-Cutoff (M:90.65,F85.75;0>M,1<M)	MCHC-Cutoff(M:347.5,F341.5;0>M,1<M)	MCV+MCH+MCHC Combination	RDW-CV	RDW-SD	PLT	RET#	IRF	LFR	MFR	HFR	RHE	RPI	Gender（2:Male, 1:Female）	RHEM（0>M；1<M）；M28.8,F28.0	RPIM（0>M,1<M)；M1.0，F0.8
232	Nasopharyngeal carcinoma	M	2	0	140	83						39.9	68.8	2.45	13.8	59.9	4.45	0.67	3.21	7.58	1.95	5.53	4.3	2	140	0	3	40.2	93.5	32.5	348	2	0	0	0	0	12.6	45.3	156	0.0543	8	92	8	0	29.8	0.9	2	0	1
212	Nasopharyngeal carcinoma	M	2	0	143	39	174	85	28.075	140	70	42.2	65.4	2.1	11.5	76.6	4.49	1.83				6.6	4.61	2	143	0	4	41.5	90.2	30.9	343	2	1	1	1	1	13	44.8	158	0.0772	8.6	91.4	8.4	0.2	28.5	1.3	2	1	0
266	Nasopharyngeal carcinoma	M	2	0	165	32	171	89	30.4367	141	85	42.3	73.1	2.02	10.5	71.5	3.65	0.8				7.03	5.67	2	165	0	4	47.9	84.5	29	343	2	1	1	1	1	13.9	44.5	235	0.1017	10.9	89.1	10.2	0.7	27.5	2.2	2	1	0
69	Nasopharyngeal carcinoma	F	1	1	105	72	160	65	25.3906	112	67	37.2	63.7	3.11	7.3	58	6.2	1.2	3.13	7.43	2.7	3.66	4.69	1	105	1	2	33	70.3	22.3	317	1	1	1	1	1	14.4	37.7	176	0.0652	15.2	84.8	14.4	0.8	22.5	0.6	1	1	1
103	Nasopharyngeal carcinoma	M	2	1	69	40				128	75	32.8	67.1	4.5	6.6	46.8	2.93	1.09	1.74	4.95	0.63	7.06	2.33	2	69	1	1	19.3	82.8	29.7	358	2	1	1	0	1	14.3	45.1	489	0.0838	16.6	83.4	14.5	2.1	31.9	0.7	2	0	1
10	Cholangiocarcinoma	F	1	0	119	44	153	50	21.3593	147	89	39.8	64.7	2.08	16.7	50.6	4.79	1.69	3.26	6.86	3.63	6.52	3.58	1	119	0	3	34	95	33.3	350	1	0	0	0	0	11.9	42.9	168	0.0499	8.3	91.7	7.4	0.9	30.1	0.7	1	0	1
7	Cholangiocarcinoma	F	1	1	100	50	159	60	23.7332	103	83	31.3	85.8	5.58	19.3	46.9	2.98	1.28				6.88	3.45	1	100	1	1	30.7	89	29	326	1	1	0	1	1	16.1	53.8	274	0.123	21.6	78.4	16.9	4.7	24.9	1.4	1	1	0
62	Cholangiocarcinoma	F	1	1	101	66	158	62	24.8358	130	70	33.7	61.6	2.94	19.6	60.6	2.89	0.76				4.96	3.42	1	101	1	1	30	87.8	29.5	337	1	1	0	1	1	13.8	45	86	0.0859	15.5	84.5	13.6	1.9	31.6	1	1	0	0
132	Cholangiocarcinoma	F	1	1	101	57	170	77.5	26.8166	122	77	34.6	60.5	2.56	8.5	40.1	3.54	1.29				2.9	3.41	1	101	1	1	29.7	87.1	29.7	341	1	1	0	1	1	13.8	45.8	164	0.0373	8.8	91.2	8.8	0	28.7	0.4	1	0	1
159	Cholangiocarcinoma	F	1	1	103	74	160	51.5	20.1172	132	69	35.1	73.6	6.47	22.1	71.7	2.65	0.39				8.89	3.48	1	103	1	1	32.3	92.7	29.6	319	1	1	0	1	1	13.4	46.4	212	0.0594	8.5	91.5	8.4	0.1	30	0.7	1	0	1
247	Cholangiocarcinoma	M	2	0	146	83	164	54	20.0773	118	73	26	55.6	3.04	56	73.6	5.3	1.16				6.03	4.36	2	146	0	4	42	96.3	33.5	348	2	0	0	0	0	14.6	54	172	0.1223	11.1	88.9	11	0.1	30.8	2.3	2	0	0
140	Cholangiocarcinoma	M	2	1	67	85						23.5	55.7	3.76	126.6	50.9	4.94	1.98				9.08	2.14	2	67	1	1	19.3	90.3	31.2	345	2	1	1	1	1	15.3	53.7	260	0.0683	15.3	84.7	12.9	2.4	30.4	0.6	2	0	1
172	Cholangiocarcinoma	M	2	1	91	53	170	66	22.8374	76	54	29.7	71.5	4.15	7.6	114.7	4.01	1.55				5.34	3.39	2	91	1	1	29	85.6	26.9	314	2	1	1	1	1	15.8	51.4	187	0.0438	16.6	83.4	12.5	4.1	22.9	0.5	2	1	1
17	Cholangiocarcinoma	M	2	1	101	75				136	61	32.2	60.7	2.99	278.6	53	2.94	2.27	2.63	7.43	2.18	6.19	3.15	2	101	1	1	27.5	87.3	32.1	368	2	0	1	0	1	17.2	57.6	243	0.0654	16	84	15.1	0.9	33.9	0.7	2	0	1
146	Cholangiocarcinoma	M	2	1	109	62	175	63	20.5714	131	73	34.4	66	4.08	227.6	58.1	6.76	1.47				6.67	3.23	2	109	1	2	29.8	92.2	33.8	366	2	0	0	0	0	15.4	54.8	224	0.0744	10.6	89.4	10	0.6	32.2	0.9	2	0	1
5	Cholangiocarcinoma	M	2	1	110	68	171	65	22.2291	158	84	41.6	69	3.82	12.9	74.6	5.95	1.2				4.17	3.56	2	110	0	2	34	95.5	30.9	323	2	1	0	1	1	17.8	65	293	0.0942	15.6	84.4	12.5	3.1	28	1.3	2	1	0
157	Cholangiocarcinoma	M	2	1	110	80	172	73	24.6755	141	79	34.2	66.9	4.02	37.4	67.6	3.63	0.63	3	10.76	0.69	7.16	3.38	2	110	0	2	30.7	90.7	32.4	357	2	0	0	0	0	14.3	50.2	298	0.0726	14	86	12	2	30.4	0.9	2	0	1
75	Cholangiocarcinoma	M	2	1	112	71	168	79	27.9904	111	68	33.1	53.8	2.96	6.6	72.6	4.67	1.62				3.47	3.5	2	112	0	2	32.6	93.1	32	344	2	0	0	1	1	13.4	47.1	123	0.0624	9.7	90.3	9.5	0.2	29.3	0.8	2	0	1
145	Cholangiocarcinoma	M	2	1	120	74	173	82	27.3982	167	76	27.6	56	1.57	242.4	50	2.57	1.54				4.57	3.29	2	120	0	2	33	100.3	36.4	363	2	0	0	0	0	14.7	56.4	86	0.1127	25.1	74.9	19	6.1	36.1	1.6	2	0	0
148	Cholangiocarcinoma	M	2	1	124	85	160	57.3	22.3828	126	74	32.2	54.6	4.14	239	77.2	3.87	2.31				5.56	3.79	2	124	0	3	35	92.3	32.6	353	2	0	0	0	0	14.8	52.6	212	0.0948	11.7	88.3	9.4	2.3	30.7	1.3	2	0	0
156	Cholangiocarcinoma	M	2	1	128	65	175	65	21.2245	157	93	31.2	56.5	5.34	69.5	45.1	4.15	1.31				3.92	4.02	2	128	0	3	36.4	90.4	31.7	351	2	1	1	0	1	13	45.1	137	0.0626	6.8	93.2	6.8	0	27.7	0.9	2	1	1
182	Lung cancer	F	1	0	130	38	161	77	29.7056	126	76	39.7	66.4	2.33	7.6	58.7	5.33	1.5				6.72	4.63	1	130	0	4	40.1	86.5	28	324	1	1	0	1	1	14.8	48.1	221	0.0701	8.6	91.4	7.8	0.8	26.5	1.1	1	1	0
179	Lung cancer	F	1	0	131	53	163	73	27.4756	158	84	37	63.2	2.6	10.6	61.8	6.82	0.64	3.91	9.99	2.28	5.07	4.49	1	131	0	4	40.2	89.6	29.2	326	1	1	0	1	1	14.4	48.7	150	0.0714	8	92	7.5	0.5	26.8	1.1	1	1	0
248	Lung cancer	F	1	0	134	54	159	52	20.5688	155	90	38	65.5	5.05	11.2	58.4	3.65	0.93	3.17	10.51	0.12	6.76	4.22	1	134	0	4	38.5	91.3	31.8	348	1	0	0	0	0	11.9	41.7	293	0.0498	10.2	89.8	10	0.2	27.8	0.8	1	1	0
87	Lung cancer	F	1	1	80	84	145	43	20.4518	128	57	37.8	79.9	2.46	7.6	113.3	4.48	0.9				5.37	3.05	1	80	1	1	25.1	82.2	26.3	320	1	1	1	1	1	16.3	51.7	70	0.0811	14.6	85.4	11.6	3	21.6	0.7	1	1	1
127	Lung cancer	F	1	1	101	70	158	46.5	18.6268	106	62	36.6	68.9	3.31	9.5	50.7	3.61	0.57				5.19	3.34	1	101	1	1	30.4	91	30.3	333	1	1	0	1	1	13.5	46.9	105	0.0353	4	96	4	0	26.6	0.4	1	1	1
6	Lung cancer	F	1	1	105	42	160	56.3	21.9922	126	80	31	51	2.18	16.5	58.3	3.88	0.57				3.75	3.52	1	105	1	2	31.2	88.4	29.8	337	1	1	0	1	1	13.6	45.9	159	0.0544	9.8	90.2	9	0.8	28.4	0.6	1	0	1
143	Lung cancer	F	1	1	107	76	149	51	22.9719	160	56	37.2	58.9	2.02	11.1	64.7	4.84	0.66	2.41	9.67	1.98	3.3	3.41	1	107	1	2	31.2	91.4	31.4	343	1	0	0	0	0	13.3	46.8	126	0.0413	7.5	92.5	7.5	0	29.1	0.5	1	0	1
84	Lung cancer	F	1	1	107	53	158	49	19.6283	125	71	39.6	70.3	5.73	13	64.2	5.02	1.34	4.2	9.17	3.18	6.65	3.22	1	107	1	2	31.6	98.2	33.3	339	1	0	0	1	1	17.1	63.2	280	0.186	29.8	70.2	22.6	7.2	31.6	2.4	1	0	0
135	Lung cancer	F	1	1	110	72	160	54	21.0938	147	75	37.3	63.2	4.36	8	82.6	3.39	0.83	2.84	10.51	2.28	3.85	3.55	1	110	0	2	32.1	90.6	30.9	342	1	0	0	0	0	13.8	48.1	220	0.0815	16.3	83.7	13.7	2.6	28.6	1	1	0	0
239	Lung cancer	M	2	0	161	75	172	76	25.6896	165	92	42.8	78	2.91	17	82	4.56	1.87	3.49	7.89	2.4	8.68	5.12	2	161	0	4	47.6	93	31.5	338	2	1	0	1	1	13.8	49	173	0.1112	9.9	90.1	9.7	0.2	29.7	2.6	2	0	0
45	Lung cancer	M	2	1	60	70	160	50	19.5312	125	59	17.6	49.5	3.76	14.8	58.1	3.08	0.71	2.32	10.59	1.47	7.57	2.37	2	60	1	1	18.1	76.1	25.3	332	2	1	1	1	1	18.9	55.5	279	0.0814	23.3	76.7	15.6	7.7	24.8	0.6	2	1	1
39	Lung cancer	M	2	1	80	67	160	49	19.1406	131	84	28.9	62	4.47	8.2	66.7	2.11	0.7	2.48	9.16	4.6	5.87	2.58	2	80	1	1	23.1	89.8	31	345	2	1	1	1	1	15	51.9	280	0.0408	16	84	13.3	2.7	26.7	0.4	2	1	1
68	Lung cancer	M	2	1	89	64	160	54	21.0938	120	78	30.6	60.4		9.5	72.2	4.37	0.72				13.78	2.84	2	89	1	1	25.7	90.6	31.1	344	2	1	1	1	1	16.7	57	162	0.1055	13.6	86.4	12.3	1.3	28.2	1.1	2	1	0
42	Lung cancer	M	2	1	93	77	170	51	17.6471	115	82	30.3	67.2	5.78	7	77	3.44	0.75	2.46	7.31	6.48	6.06	3.18	2	93	1	1	27.6	86.9	29.2	336	2	1	1	1	1	14.6	48.8	331	0.0438	18.2	81.8	14.6	3.6	28.9	0.5	2	0	1
119	Lung cancer	M	2	1	95	69	172	63	21.2953	122	70	25.5	61.3	3.66	5.6	64.1	3.3	0.84	2.53	10.9	2.09	12.25	3.16	2	95	1	1	28.7	90.9	30.2	332	2	1	0	1	1	12.6	43.8	191	0.0393	12.5	87.5	11.6	0.9	25.1	0.4	2	1	1
128	Lung cancer	M	2	1	102	78	172	66	22.3094	127	70	30.4	63.7	6.46	10.6	69	3.31	1.05	2.33	13.76	0.38	9.88	3.27	2	102	1	1	29.8	91.3	31.2	341	2	1	0	1	1	13.5	47.1	348	0.036	14.5	85.5	12.7	1.8	27.8	0.4	2	1	1
160	Lung cancer	M	2	1	108	81				163	89	23.6	61.5	4.98	8.5	64.1	2.48	0.55	2.45	11.93	2.2	9.52	3.99	2	108	1	2	31.7	79.6	27.2	342	2	1	1	1	1	16.1	47.4	304	0.0752	19.4	80.6	18.2	1.2	30.3	0.8	2	0	1
2	Lung cancer	M	2	1	112	62	165	65	23.8751	133	89	42.5	80.6	3.43	5.3	74.5	6.72	5.19	3.37	7.01	2.93	3.93	3.67	2	112	0	2	33.7	91.8	30.6	333	2	1	0	1	1	13.3	46.4	168	0.035	5.6	94.4	4.9	0.7	26.4	0.5	2	1	1
118	Lung cancer	M	2	1	115	67	163	57.9	21.7923	115	92	37.2	58.3	2.9	13.9	70.9	4.16	0.75				4.97	3.6	2	115	0	2	34.5	95.7	31.9	334	2	0	0	1	1	13.2	48.3	152	0.1264	12.1	87.9	11.2	0.9	29.8	1.8	2	0	0
136	Lung cancer	M	2	1	121	82	158	52	20.83	134	75	33.9	66.9	4.98	18.3	74	2.93	0.87	2.58	9.37	0.95	7.75	3.98	2	121	0	2	35.8	89.9	30.3	337	2	1	1	1	1	13.7	47.4	298	0.1141	14	86	12.9	1.1	26.7	1.6	2	1	0
115	Lung cancer	M	2	1	127	74	158	66.5	26.6384	137	77	35.9	68.1	3.18	11.8	79.6	3.75	0.73	2.99	8.8	1.37	4.71	4.15	2	127	0	3	37.7	90.9	30.7	337	2	1	0	1	1	13.7	47.1	201	0.0532	2.9	97.1	2.9	0	27.4	0.8	2	1	1
100	Retroperitoneal malignancy	F	1	1	97	66	155	57	23.7253	115	89	31.8	70	7.6	15.7	54.1	4.98	0.64				5.07	3.65	1	97	1	1	29.3	80.1	26.6	332	1	1	1	1	1	19.2	58.7	354	0.0988	19.5	80.5	16.9	2.6	24.8	1	1	1	0
12	Retroperitoneal malignancy	M	2	1	87	80	160	54	21.0938	148	65	28.3	53.2	3.62	8.3	93.9	4.58	1.03				5.91	2.78	2	87	1	1	25.4	91.4	31.5	344	2	1	0	1	1	13.3	46.6	253	0.0618	10.9	89.1	10.9	0	28.3	0.6	2	1	1
21	Retroperitoneal malignancy	M	2	1	108	76	170	66	22.8374	138	73	31.2	59	4.8	17.3	104.8	3.9	0.71				6.98	3.54	2	108	1	2	32.2	90.9	30.6	336	2	1	0	1	1	14	48.9	265	0.0523	9.7	90.3	9.7	0	25.9	0.6	2	1	1
63	Retroperitoneal malignancy	M	2	1	110	54	168	65	23.03	133	98	40.6	63.4	3.81	4.8	56.8	5.48	1.02	3.91	7.86	2.75	4.44	3.84	2	110	0	2	34	88.6	28.8	325	2	1	1	1	1	14.8	48.9	475	0.1109	13.1	86.9	11	2.1	30.5	1.4	2	0	0
198	Retroperitoneal malignancy	F	1	0	119	76	160	54	21.0938	116	70	34	58.9	2.69	14.1	65	4.43	0.69	2.56	10.12	3.51	4.68	3.74	1	119	0	3	34.7	92.7	31.7	342	1	0	0	0	0	13.6	48.2	126	0.057	8.1	91.9	8.1	0	29.7	0.8	1	0	0
272	Retroperitoneal malignancy	F	1	0	120	82	158	62	24.8358	158	76	37.2	60.7	3	14.7	90.4	4.98	2.74				6.45	3.9	1	120	0	3	35.6	91.4	30.9	338	1	0	0	1	1	14.1	49.7	168	0.0915	10.5	89.5	9.1	1.4	28	1.3	1	0	0
184	Retroperitoneal malignancy	F	1	0	125	54	162	75	28.578	127	78	44.3	73.9	2.65	28.8	60.1	4.89	1.64	3.27	8.35	3.86	3.81	4.25	1	125	0	4	37.6	88.6	29.5	333	1	1	0	1	1	13.9	46.8	256	0.0564	8.8	91.2	7.9	0.9	28.1	0.8	1	0	0
244	Retroperitoneal malignancy	M	2	0	146	64	178	78	24.6181	114	71	38.9	62.2	3.3	18	107.7	5.08	1.06				5.11	4.38	2	146	0	4	40.6	92.7	33.3	359	2	0	0	0	0	13.2	46.9	134	0.0879	11.8	88.2	11.6	0.2	29.2	1.5	2	0	0
22	Liver malignancy	F	1	1	95	46	162	71.7	27.3205	122	79	45.1	73.2	2.17	12.2	66	4.66	1.78				6.51	4.51	1	95	1	1	30.2	66.9	21	314	1	1	1	1	1	19	48.7	178	0.1177	12.5	87.5	10.3	2.2	20	1	1	1	0
99	Liver malignancy	F	1	1	103	73	168	76.7	27.1755	141	74	24.6	49	2.49	113.5	37.9	2.41	0.93	2.27	11.08	7.5	3.65	3.19	1	103	1	1	30	94.1	32.2	342	1	0	0	0	0	13.9	50.2	76	0.1571	17	83	14.1	2.9	29.8	1.9	1	0	0
174	Liver malignancy	F	1	1	105	69	150	51	22.6667	161	81	31.4	64	3.5	20.2	63.8	3.07	0.69	3.02	11.29	1.55	4.7	3.12	1	105	1	2	30.4	97.3	33.7	347	1	0	0	0	0	12	44.8	167	0.0917	12.4	87.6	11.7	0.7	29.8	1.1	1	0	0
37	Liver malignancy	F	1	1	111	37	174	68.45	22.6087	109	65	39.6	66.8	1.6	18.2	53.1	4.2	0.36				3.34	3.82	1	111	0	2	32.4	84.9	29	342	1	1	1	0	1	14.4	46.8	145	0.0528	7.6	92.4	7.6	0	26.7	0.6	1	1	1
121	Liver malignancy	F	1	1	111	59	163	50	18.8189	107	57	38.3	70.3	2.25	9.1	54.3	5.56	2.4	2.86	6.94	2.19	3.72	3.46	1	111	0	2	34.1	98.5	32	325	1	0	0	1	1	12.7	47.5	80	0.0384	6.3	93.7	5.5	0.8	28.7	0.5	1	0	1
24	Liver malignancy	M	2	1	92	67	165	63	23.1405	164	93	33.1	55.4	2.35	13.5	283.3	3.32	0.36				5.79	2.99	2	92	1	1	25.9	86.5	30.7	355	2	1	1	0	1	17.3	57.6	115	0.0936	12	88	11.3	0.7	29.8	0.9	2	0	1
53	Liver malignancy	M	2	1	96	74	160	47	18.3594	132	69	36.2	70.2	5.04	8.9	99.3	3.57	0.95				8.69	3.33	2	96	1	1	31.1	93.4	28.8	308	2	1	0	1	1	14.4	50.3	225	0.0593	15.2	84.8	12.5	2.7	26.4	0.7	2	1	1
57	Liver malignancy	M	2	1	103	69	168	54	19.1327	111	67	26.9	59.2	1.84	23.8	65.5	3.67	0.43				3.47	3.17	2	103	1	1	30.2	95.3	32.6	342	2	0	0	1	1	16	57.3	52	0.0638	9.6	90.4	8.6	1	37.7	0.8	2	0	1
171	Liver malignancy	M	2	1	110	53	178	85	26.8274	99	69	28.3	46.8	4.25	322.7	57.6	6.69	4.55	2.1	7.72	2.99	13.33	3.19	2	110	0	2	32	100.4	34.5	344	2	0	0	1	1	17.4	65.7	304	0.1388	17.3	82.7	13.8	3.5	37.1	1.9	2	0	0
85	Liver malignancy	M	2	1	120	60	178	45.2	14.2659	145	80	34.2	62.1	4.7	12.2	92.7	2.96	0.47	2.17	11.53	1.45	8.8	3.87	2	120	0	2	35.2	90.9	31.1	342	2	1	0	1	1	14.1	48.7	304	0.0548	8	92	8	0	28.5	0.7	2	1	1
173	Liver malignancy	M	2	1	122	47	181	74	22.5878	136	92	45.5	73.4	5.23	15.3	83.1	2.24	0.8				18.75	3.83	2	122	0	3	38.2	99.8	31.9	319	2	0	0	1	1	13.3	50.6	283	0.0653	18.1	81.9	13.3	4.8	26.8	1.1	2	1	0
261	Liver malignancy	F	1	0	129	57	155	49.5	20.6035	116	66	41.8	68.8	2.79	17.7	59.3	5.36	1.22				4.69	4.69	1	129	0	4	38.8	82.8	27.5	332	1	1	1	1	1	13.7	43.4	220	0.0524	7.9	92.1	7.9	0	25.4	0.7	1	1	1
208	Liver malignancy	F	1	0	132	46	160	63	24.6094	117	67	38.4	66.4	2.53	11.4	56.8	4.41	0.49	2.77	8.69	1.67	5.48	4.08	1	132	0	4	37.9	92.8	32.3	348	1	0	0	0	0	12.7	45.2	214	0.0778	7.2	92.8	7.1	0.1	29.6	1.2	1	0	0
181	Liver malignancy	M	2	0	161	59				157	83	37.5	62.5	2.51	17.8	66.1	6.21	0.79				4.36	4.8	2	161	0	4	47.9	99.9	33.5	335	2	0	0	1	1	13	49.1	86	0.0885	7.9	92.1	7.1	0.8	30.4	2.3	2	0	0
164	Liver malignancy	M	2	1	95	58	165	58	21.3039	121	72	27.1	61.2	2.17	37.3	58.3	3.1	0.73				6.48	2.67	2	95	1	1	27.3	102.1	35.5	348	2	0	0	0	0	14.6	54.3	140	0.1063	33.5	66.5	21.5	12	36	1.3	2	0	0
76	Cervical malignancy	F	1	0	116	38	167	57	20.4382	163	100	37.6	66.6	3.47	8	57.4	4.84	1.26				8.55	3.78	1	116	0	3	34.9	92.4	30.8	333	1	0	0	1	1	13.7	47.5	252	0.0584	4	96	4	0	29.5	0.8	1	0	0
192	Cervical malignancy	F	1	0	137	34	152	78	33.7604	105	56	39.5	71.8	3.68		48.4	5.02	0.94				9.17	4.45	1	137	0	4	41.5	93.2	30.7	329	1	1	0	1	1	13.1	46.2	287	0.0819	6.7	93.3	5.9	0.8	27.9	1.4	1	1	0
66	Cervical malignancy	F	1	1	99	75	165	74.8	27.4747	153	66	28.3	58.1	5.73	9.9	53	4.85	1.61				4.86	3.21	1	99	1	1	29	90.3	30.8	342	1	0	0	0	0	13.2	44.7	153	0.1545	31	69	19.4	11.6	28.6	1.7	1	0	0
8	Cervical malignancy	F	1	1	104	79	156	50	20.5457	145	65	35.3	58.8	4.28	11.1	58.4	3.5	0.83				4.5	3.31	1	104	1	1	30.7	92.7	31.3	338	1	0	0	1	1	12.7	45	179	0.0591	10.6	89.4	10.6	0	29.2	0.7	1	0	1
105	Cervical malignancy	F	1	1	105	70				147	66	38.9	70.5	2.1	16.4	78.1	3.65	1.49				5.04	3.36	1	105	1	2	33.5	99.9	31.4	314	1	0	0	1	1	14.1	53.6	244	0.139	9	91	7.4	1.6	29	2	1	0	0
35	Cervical malignancy	F	1	1	112	31	160	45	17.5781	107	53	41.5	74.5	2.79	0.5	47.6	3.46	0.38				4.75	3.26	1	112	0	3	32.3	99.2	34.4	347	1	0	0	0	0	11.5	44	234	0.109	10	90	8	2	31.9	1.5	1	0	0
267	Cervical malignancy	M	2	0	149	28						46.9	76	1.95	8.7	68.3	3.64	0.4				7.76	4.93	2	149	0	4	43.4	88	30.2	343	2	1	1	1	1	13.2	44.7	224	0.1014	12.4	87.6	11.7	0.7	28.7	1.8	2	1	0
262	Osteocarcinoma	F	1	0	130	17	160	43	16.7969	116	78	40.1	66.5	3.23	7.1	48.2	2.85	0.64				2.79	4.22	1	130	0	4	37.4	88.6	30.8	348	1	0	0	0	0	12.9	44	228	0.0411	3.5	96.5	3.5	0	24.3	0.6	1	1	1
242	Osteocarcinoma	F	1	0	138	42	164.3	59.1	21.8934	107	70	41.9	73.2	3.75	14.7	61.6	5.14	0.76	3.13	7.84	0.7	6.23	4.3	1	138	0	4	39.6	92	32.1	349	1	0	0	0	0	13.6	47.9	234	0.0952	8.3	91.7	8.1	0.2	29.5	1.5	1	0	0
253	Osteocarcinoma	F	1	0	140	55						48.2	78.2	2.37	18.8	51.1	4.41	1.86				7.19	4.51	1	140	0	4	40.5	89.8	31.1	347	1	0	0	0	0	12.6	43.4	257	0.1044	8.2	91.8	7.4	0.8	28.8	1.7	1	0	0
70	Osteocarcinoma	F	1	1	81	63	162	65	24.7676	137	74	28.8	46.1	2.06	20	67.9	3.08	1.32				6.32	2.69	1	81	1	1	23.3	86.6	30.2	349	1	1	0	0	1	12.6	41.2	143	0.0768	15.6	84.4	14	1.6	28.2	0.7	1	0	1
113	Osteocarcinoma	F	1	1	109	40	159	59	23.3377	114	73	42.8	80	2.46	9.3	50.5	4.72	1.09				4.47	4.08	1	109	1	2	32.5	79.5	26.7	335	1	1	1	1	1	14.6	44.1	197	0.0683	13.2	86.8	11.3	1.9	23.9	0.7	1	1	1
23	Osteocarcinoma	F	1	1	114	23	160	60	23.4375	107	75	42.7	75.3	3.22	8.5	56.3	4	0.86				10.22	4.01	1	114	0	3	33.5	83.4	28.4	341	1	1	1	1	1	14.2	45.3	383	0.0779	9.1	90.9	9.1	0	26.7	0.9	1	1	0
264	Osteocarcinoma	M	2	0	151	53	175	76.5	24.9796	145	97	41.3	73.3	6.22	9.5	93.4	4.68	1.03				8.14	4.94	2	151	0	4	42.7	86.5	30.5	353	2	1	1	0	1	13.3	44.1	259	0.0844	9.8	90.2	9.8	0	28.1	1.5	2	1	0
188	Osteocarcinoma	M	2	0	168	37						43	65.7	2.59	26.4	68.8	4.67	3.02				6.03	5.54	2	168	0	4	48.6	87.7	30.4	346	2	1	1	1	1	13.1	43	210	0.0708	7.2	92.8	7.1	0.1	27.7	1.7	2	1	0
152	Osteocarcinoma	M	2	1	117	73	155	50	20.8117	135	77	28.5	58.7	4.48	8.7	63.7	3.98	1.32				11.31	3.75	2	117	0	2	34.8	93	31.3	337	2	1	0	1	1	15.1	53.7	261	0.1666	17.2	82.8	14.5	2.7	28.8	2.3	2	0	0
154	Osteocarcinoma	M	2	1	126	74	164.8	56.3	20.7297	111	66	33.2	74.9	6.43	8.9	65.2	5.38	0.72				7.87	4.15	2	126	0	3	37.5	90.3	30.4	336	2	1	1	1	1	13.3	46.3	283	0.0706	13.1	86.9	11.1	2	26.8	1	2	1	0
94	Thyroid malignancy	F	1	1	87	46	163	60.5	22.7709	114	76	43	72.9	2.49	7.9	46.9	4.86	1.16	2.72	9.64	1.53	6.4	4.38	1	87	1	1	28.6	65.2	19.9	305	1	1	1	1	1	16.2	40.2	413	0.0516	12.8	87.2	8.9	3.9	18.9	0.4	1	1	1
153	Thyroid malignancy	F	1	1	90	28	166.7	58.2	20.9436	127	90	46.7	73.2	2.17	7.8	49	4.22	0.6	3.51	7.19	7.33	4.62	3.87	1	90	1	1	28.5	73.8	23.3	316	1	1	1	1	1	17.3	49	165	0.0635	14.4	85.6	11	3.4	21.8	0.6	1	1	1
167	Thyroid malignancy	F	1	1	105	67	151	59.5	26.0953	138	74	36.9	55.6	2.35	12.1	51.8	5.92	1.09	2.69	8.55	2.16	4.97	3.49	1	105	1	2	31.4	90	30	333	1	1	0	1	1	14.3	48	275	0.0612	8.6	91.4	8.5	0.1	33.2	0.7	1	0	1
54	Thyroid malignancy	F	1	1	106	44	161	40	15.4315	86	64	37.2	65.7	2.66	9.4	52.3	4.77	0.58	3.22	10.77	4.65	4.42	3.88	1	106	1	2	32	82.5	27.4	332	1	1	1	1	1	13.9	42.9	217	0.0377	5.8	94.2	5.8	0	29.9	0.4	1	0	1
129	Thyroid malignancy	F	1	1	108	54	151	55.4	24.2972	149	94	35.7	55.7	2.04	7.8	53.7	3.32	1.01	2.97	7.25	1.74	4.31	3.26	1	108	1	2	32.1	98.6	33.2	337	1	0	0	1	1	12.7	47.8	236	0.0503	12.2	87.8	10.9	1.3	29.7	0.7	1	0	1
162	Thyroid malignancy	F	1	1	109	46	167.1	61.3	21.9537	104	79	43.3	70.2	2.27	8.4	58.3	4.33	0.53	3.05	9.06	0.7	5.87	4.64	1	109	1	2	34.7	74.9	23.6	314	1	1	1	1	1	16	44.6	196	0.0622	10.1	89.9	9	1.1	26.2	0.7	1	1	1
123	Thyroid malignancy	F	1	1	112	63	165.4	64.6	23.6136	127	60	33.6	70.4	3.69	5.4	56.9	4.03	1.3	3.02	5.43	12.2	5.83	3.57	1	112	0	3	34.3	96.2	31.3	326	1	0	0	1	1	13.5	49	191	0.0403	10.6	89.4	8.7	1.9	27	0.6	1	1	1
77	Thyroid malignancy	M	2	1	121	64	169	65	22.7583	130	72	43.9	73.3	2.65	12.3	141.1	6.32	2.39	2.14	<2.5	72.49	6.84	3.73	2	121	0	2	35.2	94.4	32.6	345	2	0	0	1	1	13.3	47.2	155	0.0684	9.9	90.1	9.6	0.3	30.3	1	2	0	0
209	Thyroid malignancy	F	1	0	118	26	158	62.8	25.1562	125	88	42	67.2	2.38	21.4	57.2	3.93	0.49	3.01	8.8	0.78	6.43	4.01	1	118	0	3	35.4	88.3	29.5	334	1	1	0	1	1	13.1	44.3	266	0.0546	6.2	93.8	6.2	0	26.7	0.7	1	1	1
204	Thyroid malignancy	F	1	0	118	34	161	68.4	26.3879	125	91	41	71.6	3.52	21.2	43.7	4.63	0.9	3.09	9.3	1.23	7.53	3.96	1	118	0	3	33.6	84.9	29.7	350	1	1	1	0	1	13.6	44.1	300	0.0741	8.5	91.5	8.3	0.2	28	0.9	1	0	0
206	Thyroid malignancy	F	1	0	124	85	147.4	53.2	24.4859	132	85	35.7	62.3	4.36	10.5	60.3	4.84	1.59	2.66	6.97	2.36	4.8	4.14	1	124	0	3	37	89.5	30.1	336	1	1	0	1	1	14.3	49	172	0.072	8.6	91.4	8.6	0	27.5	1	1	1	0
177	Thyroid malignancy	F	1	0	125	58	156.8	62.9	25.5834	127	89	36.4	61.9	2.43	10	62.4	4.2	1.32	2.77	7.95	0.95	4.64	4.25	1	125	0	4	39.7	93.4	29.5	315	1	1	0	1	1	13.4	47.2	168	0.0635	7.6	92.4	7.6	0	26.9	1	1	1	0
222	Thyroid malignancy	F	1	0	130	57	161	62	23.9188	130	80	43.1	75.3	3.52	12.6	48.2	5.66	1.33	3.47	11.71	1.71	12.28	4.37	1	130	0	4	38.1	87.1	29.7	341	1	1	0	1	1	14.3	47.6	242	0.1089	15	85	13.4	1.6	29.5	1.6	1	0	0
250	Thyroid malignancy	F	1	0	134	39	162.4	63.4	24.039	124	77	48.2	76.6	2.79	12	48.2	3.96	0.84	3.82	9.66	2.27	3.87	4.01	1	134	0	4	38.7	96.4	33.3	345	1	0	0	0	0	13.1	48.3	347	0.0855	5.6	94.4	5.6	0	29.9	1.4	1	0	0
281	Thyroid malignancy	F	1	0	135	37	158.3	53	21.1502	93	63	45.9	74.4	2.99	9.1	44.3	4.1	0.83	3.39	9.83	1.75	6.74	4.49	1	135	0	4	39.9	89	30.1	338	1	1	0	1	1	12.9	43.7	242	0.1059	6	94	6	0	27.9	1.7	1	1	0
270	Thyroid malignancy	F	1	0	135	38	161.6	56	21.444	98	70	48.4	78.4	3.04	37.5	53.4	5.19	0.8	3.59	9.21	1.25	8.47	4.22	1	135	0	4	38.3	90.8	31.9	351	1	0	0	0	0	12.7	44.1	337	0.0539	4.8	95.2	4.8	0	29.2	0.8	1	0	0
205	Thyroid malignancy	F	1	0	142	54	159	62	24.5243	141	78	42.9	68.4	2.37	7.1	65	5.27	5	3.35	10.31	0.17	6.94	4.53	1	142	0	4	41.2	91.1	31.3	343	1	0	0	0	0	11.9	41.3	316	0.0652	6	94	6	0	27.9	1.1	1	1	0
269	Thyroid malignancy	M	2	0	159	37	176	65.5	21.1454	97	64	43.7	71.3	3.09	8.9	83.4	3.95	1.67	2.54	9.7	0.43	7.51	5.38	2	159	0	4	46.2	85.7	29.5	344	2	1	1	1	1	13.6	44.3	191	0.0765	5.1	94.9	5.1	0	26.8	1.5	2	1	0
193	Thyroid malignancy	M	2	0	181	35	169.6	65.8	22.8757	144	98	48.5	81.3	3.1	18	84.1	5.65	2.28	4.01	13.78	0.03	10.41	6.34	2	181	0	4	52.8	83.3	28.6	343	2	1	1	1	1	13.2	41.2	290	0.1248	4.7	95.3	4.7	0	26.7	3.8	2	1	0
142	Colon malignancy	F	1	1	79	35	160	43	16.7969	113	75	31.6	56.3	4.98	10	45.3	5	1.53	3.1	9.9	1.44	3.26	3.98	1	79	1	1	27.1	68.1	19.9	293	1	1	1	1	1	25.1	65.6	355	0.05	9.4	90.6	8.8	0.6	20.5	0.4	1	1	1
168	Colon malignancy	F	1	1	79	63	155	53	22.0604	116	68	34.5	65.4	3.97	10.4	47.4	3.53	1.02				6.07	3.55	1	79	1	1	24.6	69.3	22.2	320	1	1	1	1	1	17.4	44.7	169	0.0698	19.9	80.1	16.4	3.5	22.6	0.5	1	1	1
130	Colon malignancy	F	1	1	81	75	150		0	135	85	22.1	54.6	5.66	9.2	40.3	1.53	0.78				7.88	2.87	1	81	1	1	25.4	88.6	28.2	319	1	1	0	1	1	15.1	50.9	440	0.051	37.3	62.7	23.2	14.1	27.2	0.5	1	1	1
158	Colon malignancy	M	2	1	102	23						43.4	75.5	3.05	13	74.3	2.97	0.5				5.76	5.47	2	102	1	1	33.5	61.2	18.6	304	2	1	1	1	1	21.2	49.3	455	0.1019	14.2	85.8	11.9	2.3	18.7	0.9	2	1	1
155	Colon malignancy	M	2	1	115	58	172	76	25.6896	155	74	42.3	67	4.22	11.3	74.9	4.84	1.85				6.35	3.72	2	115	0	2	33.5	90.2	30.9	343	2	1	1	1	1	13.8	47.5	199	0.1172	18	82	15.1	2.9	28.1	1.5	2	1	0
240	Colon malignancy	F	1	0	116	77	140	40	20.4082	139	68	33.9	65.8	4.14	10.1	82.5	4.51	2.33	2.94	11.1	1.53	7.11	4.25	1	116	0	3	34.4	80.9	27.4	339	1	1	1	1	1	13.8	43	135	0.0198	3.4	96.6	3.4	0	25.6	0.2	1	1	1
224	Colon malignancy	F	1	0	123	16	163.6	41.3	15.4306	108	66	42.8	69.3	2.27	14	62.4	3.68	0.4	3.85	9.07	6.86	9.87	4.15	1	123	0	3	35.5	85.7	29.6	345	1	1	1	0	1	14.8	48.8	346	0.0822	7.1	92.9	6.7	0.4	27.8	1.1	1	1	0
252	Colon malignancy	F	1	0	126	55						42.7	72.9	3.5	14.2	45.9	5.63	1.04				5.67	4.03	1	126	0	4	35.9	88.9	31.3	353	1	0	0	0	0	12.6	42.9	214	0.0778	7.9	92.1	7.8	0.1	30.1	1.1	1	0	0
186	Colon malignancy	F	1	0	140	74	158	60	24.0346	123	73	41.5	71.9	3.31	9.9	64.4	4.81	1.05				4.62	4.91	1	140	0	4	42.3	86.3	28.5	331	1	1	0	1	1	14.3	46.7	242	0.0689	3.8	96.2	3.8	0	27.1	1.2	1	1	0
58	Colon malignancy	F	1	1	69	70	158	60	24.0346	119	68	34.9	61.2	4.71	6.2	91.8	4.72	1	1.89	9.23	1.09	5.3	3.35	1	69	1	1	23	68.7	20.6	300	1	1	1	1	1	20.5	52.7	288	0.0527	20.6	79.4	17.4	3.2	20.8	0.4	1	1	1
134	Colon malignancy	F	1	1	104	56	163	59	22.2063	97	63	39.8	67.7	3.21	10.6	47.8	4.64	1.44	2.67	5.92	3.75	4.35	3.48	1	104	1	1	30	86.1	29.8	346	1	1	0	0	1	12.8	42.4	284	0.0911	13.1	86.9	11.7	1.4	28.1	1	1	0	0
112	Colon malignancy	F	1	1	106	64	158	47.5	19.0274	120	74	28	58.4	3.92	8.8	46.2	4.6	1.26				6.56	3.66	1	106	1	2	32.1	87.7	28.9	330	1	1	0	1	1	13.5	44.9	305	0.0789	8	92	8	0	26.7	0.9	1	1	0
50	Colon malignancy	F	1	1	107	52	158	58	23.2335	132	77	33.2	60	3.94	8.3	47	3.5	1.13	2.74	10.17	0.87	9.19	4.27	1	107	1	2	33.8	79.1	25.1	317	1	1	1	1	1	13.6	40.1	216	0.0611	14.5	85.5	11.9	2.6	24.3	0.7	1	1	1
107	Colon malignancy	F	1	1	108	57	155	65	27.0552	138	76	37.9	69	3.68	14.9	46.5	5.65	1.86	2.33	5.96	5.56	4.41	3.8	1	108	1	2	32.7	86	28.4	331	1	1	0	1	1	14.7	48	123	0.0481	10.1	89.9	9.6	0.5	26.6	0.6	1	1	1
124	Colon malignancy	F	1	1	114	69	156	42.5	17.4638	116	53	33.9	55.7	1.86	9.7	52.4	4.86	0.75	2.67	6.35	3.49	3.43	3.62	1	114	0	3	34.8	96.2	31.4	326	1	0	0	1	1	13.8	50.7	181	0.0481	3.9	96.1	3.6	0.3	29.2	0.7	1	0	1
201	Colon malignancy	M	2	0	156	60	170	63.5	21.9723	123	84	30.2	60.8	4.57	23.8	74.6	5.67	1.26				7.59	5.42	2	156	0	4	45.3	83.6	28.8	345	2	1	1	1	1	17.4	55.4	184	0.1011	12.3	87.7	11.9	0.4	26.8	1.9	2	1	0
265	Colon malignancy	M	2	0	156	65	163	72	27.0993	125	65	41.9	78.5	3.66	13.1	102.2	4.01	2.44	3.28	7.75	1.75	6.47	4.55	2	156	0	4	44	96.7	34.3	355	2	0	0	0	0	13.1	48.4	110	0.0856	12	88	10.6	1.4	30.4	1.8	2	0	0
277	Colon malignancy	M	2	0	157	69						40.3	69		18.5	84.5	5.46	1.72				9.22	4.56	2	157	0	4	45.1	99	34.5	348	2	0	0	0	0	12.5	46.8	215	0.078	8	92	8	0	31.6	1.7	2	0	0
109	Colon malignancy	M	2	1	82	53	160	56	21.875	154	90	40.8	69.1	3.68	7.3	74.3	3.49	0.66				5.59	3.7	2	82	1	1	26.1	70.7	22.2	314	2	1	1	1	1	15.6	42.3	436	0.0623	15.4	84.6	11.2	4.2	19.5	0.5	2	1	1
61	Colon malignancy	M	2	1	86	73		49		134	75	26.9	55.1	4.22	11.6	81.5	4.38	0.9	2.77	9.75	0.88	6.8	3.11	2	86	1	1	25.8	82.9	27.8	335	2	1	1	1	1	12.5	38.7	270	0.031	8.9	91.1	8.9	0	27.3	0.3	2	1	1
82	Colon malignancy	M	2	1	87	80	160	41	16.0156	149	86	28.7	55.8	2.49	5.9	74.3	3.93	1.15	2.64	10.66	3.23	5.14	3.61	2	87	1	1	27	74.6	24.1	323	2	1	1	1	1	35.2	98.2	210	0.0593	12.6	87.4	10.3	2.3	29.7	0.5	2	0	1
98	Colon malignancy	M	2	1	88	69	176	66	21.3068	142	81	40.5	70	3.97	15.6	78.3	3.12	0.79	2.83	11.2	1.47	4.44	3.5	2	88	1	1	27	77	25.2	327	2	1	1	1	1	15.6	46	372	0.0598	14.7	85.3	12.5	2.2	21.4	0.5	2	1	1
32	Colon malignancy	M	2	1	90	67	164	50	18.5901	108	68	31	55	4.9	10.2	59.5	3.53	1.13	1.93	9.71	3.03	5.13	3.17	2	90	1	1	26.4	83.1	28.3	341	2	1	1	1	1	14.5	46.5	224	0.021	7.9	92.1	7.9	0	22.5	0.2	2	1	1
79	Colon malignancy	M	2	1	119	73	165	78.5	28.8338	164	89	26.9	49	3.05	14.7	79.5	2.38	0.98	3.26	10.49	0.91	5.4	3.92	2	119	0	2	35.2	89.7	30.4	339	2	1	1	1	1	12.7	42.8	136	0.0692	6.4	93.6	6.4	0	28	0.9	2	1	1
163	Ovary malignancy	F	1	1	96	42	147	49.8	23.046	161	62	44.8	76	3.37	7.3	412	4.41	0.86				4.55	3.44	1	96	1	1	29.5	85.7	27.8	324	1	1	1	1	1	13.4	43.1	136	0.0481	2.1	97.9	2.1	0	29.8	0.5	1	0	1
97	Ovary malignancy	F	1	1	107	50	155	36.5	15.1925	93	55	43.3	69.2	3.08	12.8	58.3	4.48	0.76				5.02	3.26	1	107	1	2	31	95.2	32.9	345	1	0	0	0	0	12.1	43.9	228	0.0336	8.4	91.6	7.7	0.7	30.2	0.4	1	0	1
259	Ovary malignancy	F	1	0	125	44	159	50.5	19.9755	98	77	39.5	78.8	3.59	5.9	57.8	3.68	0.51				4.13	4.07	1	125	0	4	37.2	91.2	30.8	338	1	0	0	1	1	12.5	44	279	0.0396	7.9	92.1	7.5	0.4	26.2	0.6	1	1	1
254	Ovary malignancy	F	1	0	142	50	157	47.5	19.2706	139	87	47	80.6	2.75	13.7	73.9	5.12	0.9				7.93	4.5	1	142	0	4	40.1	89.3	31.6	354	1	0	0	0	1	13.1	44.7	192	0.0487	7.8	92.2	7.8	0	29	0.8	1	0	0
211	Brain malignancy	F	1	0	115	61						40	65.9	3.03	9.1	66.5	4.7	1.98				6.91	3.77	1	115	0	3	33.2	88.1	30.4	345	1	1	0	0	1	13.1	44.4	192	0.0823	8.3	91.7	8	0.3	28	1	1	0	0
235	Brain malignancy	F	1	0	122	56				90	68	35.8	58	2.52	10.8	53.3	3.98	0.43				4.36	3.85	1	122	0	3	35.2	91.4	31.8	347	1	0	0	0	0	11.9	41.9	208	0.0524	10.9	89.1	10.5	0.4	29.3	0.7	1	0	1
223	Brain malignancy	F	1	0	130	57	150	55	24.4444	130	88	42.6	69.8	2.3	18.3	59.1	4.25	1.49				6.8	4.03	1	130	0	4	37.1	92.1	32.3	351	1	0	0	0	0	13.4	47.4	283	0.0741	7.9	92.1	7.9	0	30.5	1.1	1	0	0
271	Brain malignancy	F	1	0	136	27	160	60	23.4375	92	63	40.7	67.6	2.42	14.3	60.9	5.18	0.96	3.17	7.87	0.02	6.44	4.66	1	136	0	4	38.4	82.3	29.2	354	1	1	1	0	1	13.4	42.1	219	0.0891	8.2	91.8	8.2	0	27	1.2	1	1	0
246	Brain malignancy	F	1	0	137	60	146	54	25.3331	121	58	39.7	68.3	2.79	10	62.8	4.1	2.32				7.23	4.31	1	137	0	4	39.3	91.1	31.7	348	1	0	0	0	0	12.6	44.1	140	0.0988	9.9	90.1	9.9	0	29.2	1.6	1	0	0
30	Brain malignancy	F	1	1	111	50	165	60	22.0386	105	83	35.3	57.1	2.3	10.1	45.9	4.26	3.15				3.61	3.51	1	111	0	2	32.6	92.9	31.7	341	1	0	0	1	1	13.1	46.8	187	0.0639	10.2	89.8	9.7	0.5	27.6	0.8	1	1	0
73	Brain malignancy	F	1	1	112	72	157	42	17.0392	145	90	32.9	65.8	1.66	7.7	60.6	4.34	0.6				4.27	3.37	1	112	0	3	32.7	96.9	33.2	343	1	0	0	0	0	12.9	46.9	123	0.0775	4	96	4	0	30.9	1	1	0	0
187	Brain malignancy	M	2	0	140	47	165	67	24.6097	135	92	34.8	58.8	2.84	10.5	91.2	5.18	0.42	2.88	7.94	1.35	6.97	4.71	2	140	0	3	42.2	89.6	29.8	332	2	1	1	1	1	14	47.2	164	0.0619	7.3	92.7	7.3	0	27	1.1	2	1	0
233	Brain malignancy	M	2	0	144	57	162	61	23.2434	98	62	38.5	66.4	2.57	7.7	65	4.12	1.03				5.05	4.31	2	144	0	4	41.9	97.1	33.5	345	2	0	0	1	1	12.5	46.5	154	0.0605	6.3	93.7	6.3	0	31.4	1.1	2	0	0
234	Brain malignancy	M	2	0	148	75	175	84	27.4286	155	84	36.2	63.6	3.3	13.8	80	2.55	0.93				5.34	4.45	2	148	0	4	42.9	96.4	33.2	345	2	0	0	1	1	12.2	45	232	0.0633	14	86	13.3	0.7	30.6	1.2	2	0	0
194	Brain malignancy	M	2	0	153	27						45.8	79.6	2.67	7	59.4	3.61	2.49				7.64	4.96	2	153	0	4	45.7	92.1	31	336	2	1	0	1	1	12.6	43.8	209	0.0744	6.6	93.4	5.5	1.1	28.5	1.6	2	1	0
126	Brain malignancy	M	2	1	90	77	170	73	25.2595	128	79	33.1	55.1	1.96	19.2	85.8	4.57	0.85				2.59	3.85	2	90	1	1	28.5	73.8	23.4	317	2	1	1	1	1	15.8	43.8	128	0.0616	10.8	89.2	9.7	1.1	23	0.6	2	1	1
230	Brain malignancy	M	2	1	109	50	173	81	27.0641	142	97	39.6	64.8	2.44	21.8	72.9	5.12	3.8				4.97	3.54	2	109	1	2	31.4	88.7	30.8	347	2	1	1	1	1	13	44.5	196	0.0571	9.8	90.2	9.8	0	27.7	0.7	2	1	1
41	Brain malignancy	M	2	1	117	69	170	65	22.4913	154	92	33.4	55.9	5.83	12.2	57.7	3.15	1.49	2.53	9.26	2.91	6.02	3.92	2	117	0	2	32.6	83	29.7	358	2	1	1	0	1	13	41.6	216	0.0614	22.5	77.5	17.1	5.4	27.7	0.7	2	1	1
131	Brain malignancy	M	2	1	129	14	150	35	15.5556	112	64	42.1	62.5	1.8	10.3	36.7	3.96	0.67				4.55	3.95	2	129	0	3	36.9	93.4	32.6	349	2	0	0	0	0	13.4	47.6	171	0.0369	3.9	96.1	3.9	0	30.5	0.5	2	0	1
189	Bladder malignancy	F	1	0	118	67	148	50	22.8269	111	56	38.2	64	2.93	14.9	51.3	4.77	0.8				6.84	3.47	1	118	0	3	34.9	100.5	33.9	337	1	0	0	1	1	13.5	51.9	77	0.0652	7.7	92.3	7.1	0.6	30.4	1	1	0	0
273	Bladder malignancy	M	2	0	134	81	160	63	24.6094	153	83	40.4	66.5	3.18	10.1	92.7	4.7	2.16				3.95	4.36	2	134	0	3	41.3	94.8	30.8	325	2	1	0	1	1	13.7	48.5	193	0.0972	17.6	82.4	15.5	2.1	33.5	1.7	2	0	0
180	Bladder malignancy	M	2	0	135	80	168	72	25.5102	140	72	38.7	71.4	3.8	8.7	94	5.03	3.21	3.51	7.75	1.23	6.5	4.16	2	135	0	3	39.9	95.9	32.5	338	2	0	0	1	1	12.5	45.4	184	0.0517	12.7	87.3	11.9	0.8	29.9	0.9	2	0	1
92	Bladder malignancy	M	2	1	122	67	160	50	19.5312	137	81	33.6	58.7	3.16	9.4	122	4.31	0.7	2.91	6.49	1.31	5.17	3.72	2	122	0	3	35.7	95.9	32.7	341	2	0	0	1	1	13	47.6	96	0.0633	6.9	93.1	6.9	0	28.9	0.9	2	0	1
120	Bladder malignancy	M	2	1	125	65						39.1	67.5	2.51	17.9	75.6	3.88	1.4	3.74	13.78	0.43	4.93	3.97	2	125	0	3	35.9	90.5	31.4	347	2	1	1	1	1	13.3	45.6	139	0.0498	8.3	91.7	8.3	0	29.3	0.7	2	0	1
114	Bladder malignancy	M	2	1	125	82	171	76	25.9909	131	79	34.2	71	5.99	15.4	60.1	4.79	1.38	2.71	10.32	2.07	9.28	3.89	2	125	0	3	36.8	94.6	32.1	340	2	0	0	1	1	11.8	42.8	264	0.0812	17.1	82.9	13.4	3.7	27.4	1.2	2	1	0
117	Bladder malignancy	M	2	1	62	64	164	56	20.8209	109	65	31.5	54.8	3.24	5.4	76.7	3.93	0.91				5.53	3.25	2	62	1	1	21.1	64.8	18.9	292	2	1	1	1	1	19.4	47.9	205	0.0536	17	83	13.5	3.5	17.1	0.4	2	1	1
72	Bladder malignancy	M	2	1	125	71	157	42	17.0392	145	90	39.6	68.1	4.03	13.6	108.4	4.27	1.12				6.5	4.03	2	125	0	3	37.3	92.5	31	335	2	1	0	1	1	12.3	42.7	155	0.0666	7.1	92.9	7.1	0	29.3	1	2	0	0
196	Prostate malignancy	M	2	0	131	74	156	60	24.6548	152	80	34.8	57.8	2.22	10.9	93.2	3.79	0.88				7.62	4.04	2	131	0	3	38.4	95.1	32.5	342	2	0	0	1	1	12.3	44.6	179	0.0939	11.5	88.5	11.1	0.4	30.2	1.5	2	0	0
251	Prostate malignancy	M	2	0	136	74	172	90	30.4218	128	71	40.1	69.2	4.28	10.2	73.2	5.39	1.49				7.23	4.4	2	136	0	3	39.4	89.6	30.9	344	2	1	1	1	1	13	44.7	166	0.0721	13	87	12.2	0.8	28.2	1.1	2	1	0
256	Prostate malignancy	M	2	0	142	71	168	67	23.7387	124	86	45.2	68.1	3.5	11.1	61.4	6.7	0.98	2.79	7.24	4.81	5.66	4.32	2	142	0	4	39.2	90.9	32.9	362	2	0	0	0	0	13.1	45.5	205	0.0699	5.8	94.2	5.8	0	29.8	1.1	2	0	0
221	Prostate malignancy	M	2	0	143	70	173	66	22.0522	143	82	38.8	70.4	2.84	15.1	73.3	5.47	1.41				4.45	4.72	2	143	0	4	41.5	87.8	30.3	345	2	1	1	1	1	13.4	44.9	181	0.0384	7.5	92.5	7.5	0	27.4	0.6	2	1	1
226	Prostate malignancy	M	2	0	143	66	175	60	19.5918	110	72	42.7	72.5	2.17	11.1	56	5.78	0.76	3.32	7.44	2.04	4.21	4.55	2	143	0	4	41.6	91.5	31.3	342	2	1	0	1	1	13.1	46	183	0.0723	6.2	93.8	6.2	0	29	1.3	2	0	0
283	Prostate malignancy	M	2	0	148	69	165	77	28.2828	166	90	46.9	77.6	2.32	14.2	74.3	6.43	1.68	3.54	7.84	1.47	6.18	4.74	2	148	0	4	44	92.8	31.2	336	2	1	0	1	1	13.7	48.2	246	0.0613	8.2	91.8	8.1	0.1	29.4	1.2	2	0	0
258	Prostate malignancy	M	2	0	150	60	170	78	26.9896	117	71	41.8	66.8	4.02	11.1	99.4	3.81		3.47	7.41	4.08	5.27	4.85	2	150	0	4	42.7	88	30.9	352	2	1	1	0	1	12.8	43	295	0.0596	10.7	89.3	10.7	0	27.1	1	2	1	0
274	Prostate malignancy	M	2	0	154	69						45.1	73.4	3.65	11.2	78.2	3.77	1.41	3.44	11.31	1.78	5.48	5.15	2	154	0	4	47.5	92.2	29.9	324	2	1	0	1	1	13	44.5	247	0.0972	6.2	93.8	6.2	0	33.1	2.3	2	0	0
191	Prostate malignancy	M	2	0	164	59	177	81	25.8546	123	77	45.6	72.2	2.21	19.4	62.6	3.45	1.1	2.93	8.27	2.4	5.26	5.46	2	164	0	4	49.5	90.7	30	331	2	1	0	1	1	13.6	46.5	140	0.0821	7.1	92.9	7.1	0	28.8	2.1	2	0	0
36	Prostate malignancy	M	2	1	79	85	170	53	18.3391	120	55	30.3	55.6	5.06	9.6	47.7	3.64	0.78				2.68	2.49	2	79	1	1	22.5	90.3	31.5	349	2	1	1	0	1	14.2	49.9	131	0.0327	8.8	91.2	7.8	1	22	0.3	2	1	1
9	Prostate malignancy	M	2	1	114	95	170	60	20.7612	133	72	33.1	62.7	4.89	7.5	93.6	3.97	1.22				7.51	3.94	2	114	0	2	33.7	85.5	29	339	2	1	1	1	1	13.9	44.9	310	0.061	8.7	91.3	8.2	0.5	26.6	0.7	2	1	1
20	Prostate malignancy	M	2	1	116	62	172	72	24.3375	131	76	40.9	67.9	3.97	25.2	67.7	5.16	2.19				7.94	3.74	2	116	0	2	33.3	89.1	31.1	349	2	1	1	0	1	13.7	46.3	124	0.0501	39.3	60.7	20.3	19	30.6	0.6	2	0	1
59	Prostate malignancy	M	2	1	116	68	172	76	25.6896	106	3	39.1	62.4	2.74	10.9	101	4.85	1.37				5.28	3.86	2	116	0	2	35	90.8	30.1	332	2	1	0	1	1	14.8	50.2	158	0.1092	22.5	77.5	15.7	6.8	33.5	1.5	2	0	0
91	Prostate malignancy	M	2	1	118	76	175	66	21.551	127	71	34.5	63.5	2.35	18	78.5	2.78	1.01				5.73	3.79	2	118	0	2	33.4	88.3	31.3	354	2	1	1	0	1	13.1	44.1	224	0.0529	5.1	94.9	5.1	0	28.1	0.7	2	1	1
110	Prostate malignancy	M	2	1	119	77						39.3	74.2	4.2	13.4	100	5.7	1.03	3.4	10.89	2.68	6.53	2.91	2	119	0	2	34.9	120.1	41	342	2	0	0	1	1	14.4	66.3	643	0.0591	20	80	14.5	5.5	41.6	1	2	0	0
151	Prostate malignancy	M	2	1	126	62	172	81	27.3797	167	110	41	69.4	5.94	13.2	146.3	3.65	1.57	3.39	9.02	1.45	10.31	4.22	2	126	0	3	36.7	86.9	29.9	344	2	1	1	1	1	14.1	46.8	235	0.0854	7.6	92.4	7.3	0.3	26.5	1.2	2	1	0
96	Prostate malignancy	M	2	1	129	79	166	49	17.782	119	74	35.2	60.1	2.08	16.5	82.6	3.39	0.61				4.24	3.7	2	129	0	3	36.5	98.8	34.9	353	2	0	0	0	0	13.8	51.7	130	0.0687	9.1	90.9	8.6	0.5	31.9	1.1	2	0	0
276	Breast malignancy	F	1	0	142	41	158	50	20.0288	119	82	40.7	65.7	2.01	14.5	84.3	3.85	0.99	3.22	11.83	0.38	4.65	4.48	1	142	0	4	40.1	89.6	31.7	354	1	0	0	0	0	13.2	45.4	187	0.1407	8.5	91.5	8.5	0	29.4	2.3	1	0	0
279	Breast malignancy	F	1	0	129	56								1.86								5.93	4.18	1	129	0	4	38.4	91.8	30.9	336	1	0	0	1	1	12.8	44.5	144	0.0943	11.3	88.7	10.2	1.1	28.8	1.4	1	0	0
202	Breast malignancy	F	1	0	130	37	163	56	21.0772	109	64	45	72	2.91	10.4	50.4	4.5	0.82				12.47	4.1	1	130	0	4	37.3	91.1	31.6	347	1	0	0	0	0	13.7	47.8	328	0.0798	6.3	93.7	6.3	0	28.8	1.2	1	0	0
278	Breast malignancy	F	1	0	146	60	155	50	20.8117	126	68	43.4	75.9		8.6	65.3	6.38	1.65	2.94	10.17	0.21	7.97	4.57	1	146	0	4	42.6	93.3	32	343	1	0	0	0	0	11.9	42	360	0.0874	8.1	91.9	8.1	0	30.7	1.6	1	0	0
280	Breast malignancy	F	1	0	246	60						39.6	68.8	2.35	15.9	68	3.61	1.87	3.07	7.04	26.16	3.17	7.79	1	246	0	4	72.5	93.1	31.6	339	1	0	0	1	1	13.3	46.2	32	0.1499	9.5	90.5	9.1	0.4	30.9	1.3	1	0	0
86	Breast malignancy	F	1	1	87	43						38.2	74.3	5.46	11.1	56.1	3.68	1.26				7.93	5.14	1	87	1	1	30.2	58.7	16.9	287	1	1	1	1	1	19.1	42.2	639	0.0797	18.4	81.6	14.1	4.3	18.6	0.6	1	1	1
64	Breast malignancy	F	1	1	106	43	168	63	22.3214	136	71	37.8	62.2	2.72	9.3	67	4.4	1.58				6.46	4.17	1	106	1	2	32.2	77.2	25.3	328	1	1	1	1	1	15.4	45.5	205	0.0509	11.9	88.1	11	0.9	22.9	0.5	1	1	1
18	Breast malignancy	F	1	1	107	71				159	85	23.1	52.9	1.42	31.6	26.7	3.04	0.53				2.27	2.91	1	107	1	2	30.9	106.3	36.8	346	1	0	0	0	0	16	64.4	51	0.0895	9.7	90.3	8.2	1.5	33.1	1.2	1	0	0
88	Breast malignancy	F	1	1	111	70	156	45.7	18.7788	136	69	40.8	70	2.84	8.5	67.1	5.62	1.21				5.34	3.5	1	111	0	2	33.4	95.6	31.9	333	1	0	0	1	1	13.6	49.4	292	0.0732	14.2	85.8	12.2	2	30.4	1	1	0	0
65	Breast malignancy	F	1	1	113	43	170	65	22.4913	137	79	42.3	75.8	2.19	7.6	57.6	3.6	2.84				7.25	4.43	1	113	0	3	34.7	78.3	25.5	326	1	1	1	1	1	15.5	46.4	335	0.0716	14	86	12.7	1.3	23.2	0.8	1	1	0
40	Breast malignancy	F	1	1	113	50	157	57	23.1247	135	86	36.4	61.6	2.34	8.8	54.8	4.13	0.88	2.93	8.19	7.31	3.43	3.49	1	113	0	3	31.9	91.4	32.4	354	1	0	0	0	0	13	45.8	217	0.0401	6.1	93.9	6.1	0	29.3	0.5	1	0	1
138	Breast malignancy	F	1	1	114	21						43.8	72.1	2.75	6.4	48.9	5.03	0.84				5.85	3.62	1	114	0	3	33.1	91.4	31.6	345	1	0	0	0	0	13.9	49.1	220	0.0919	6	94	6	0	28.9	1.2	1	0	0
225	parotid gland malignancy	F	1	0	120	57	159.9	45.1	17.6392	115	80	41.4	67.6	2.58	10.2	75.1	4.72	0.88	2.65	8.19	3.52	4.57	3.57	1	120	0	3	34.3	96.2	33.5	349	1	0	0	0	0	13	48.4	194	0.053	8.4	91.6	8.4	0	30.5	0.7	1	0	1
237	parotid gland malignancy	F	1	0	143	30								2.79								5.13	5.03	1	143	0	4	41.1	81.7	28.4	348	1	1	1	0	1	14.8	46.3	285	0.0728	6.9	93.1	6.9	0	26.3	1.1	1	1	0
183	parotid gland malignancy	M	2	0	148	59	176	70	22.5981	142	67	46.2	74	3.58	11.8	68.2	5.85	2.31	3.76	9.41	0.96	7.01	4.76	2	148	0	4	44.5	93.5	31.2	333	2	1	0	1	1	12.7	45	274	0.0781	9.8	90.2	9.3	0.5	28.1	1.6	2	1	0
284	Renal cancer	F	1	0	125	44	158	47.5	19.0274	101	64	44.5	71.6	2.61	15.6	49.2	3.41	0.97				7.59	4.19	1	125	0	4	36.5	87.1	29.7	341	1	1	0	1	1	13.7	45.5	227	0.0473	7.7	92.3	7.7	0	27.2	0.6	1	1	1
238	Renal cancer	F	1	0	125	62	160	65	25.3906	168	77	41.3	73.3	2.62	9.7	57	5.92	1.19				6.46	4.36	1	125	0	4	37	85	28.6	337	1	1	1	1	1	14.2	46.2	200	0.0534	6.3	93.7	6.3	0	27.5	0.7	1	1	1
199	Renal cancer	F	1	0	129	47	155	79	32.8824	136	74	35.9	60.6	2.22	9.4	68.4	5.2	1.43	2.9	6.87	4.35	5.3	4.33	1	129	0	4	37.5	86.4	29.7	343	1	1	0	0	1	14.7	48.4	203	0.0693	6.6	93.4	6.6	0	28.1	1	1	0	0
220	Renal cancer	F	1	0	130	45	156	56	23.0112	104	56	37.5	62.4	1.7	12.3	45.6	3.88	1.72	3.25	7.81	1.77	5.44	3.92	1	130	0	4	36.3	92.4	33	357	1	0	0	0	0	12.2	43.1	180	0.0665	11	89	10.7	0.3	29.3	1	1	0	0
122	Renal cancer	F	1	0	223	42	154	53	22.3478	121	75	32.5	60.5	3.25	7.6	455.9	6.51	1.35	2.8	13.6	1.26	21.25	7.95	1	223	0	4	70.2	88.3	28.1	318	1	1	0	1	1	13	42.4	345	0.0615	4.6	95.4	2.3	2.3	25.1	0.6	1	1	1
139	Renal cancer	F	1	1	88	45	155	60	24.974	104	66	40.6	71.4	2.87	9.7	51.2	4.63	1.01				4.7	3.72	1	88	1	1	27.9	75	23.5	314	1	1	1	1	1	17.5	50.4	211	0.1323	18.7	81.3	13.4	5.3	22.2	1.2	1	1	0
111	Renal cancer	F	1	1	101	83	155	57	23.7253	167	69	35.3	67.3	5.09	9	131.7	5.41	1.37	2.6	7.34	1.8	8.02	3.13	1	101	1	1	29.3	93.4	32.2	345	1	0	0	0	0	13.3	47.4	142	0.0433	15.2	84.8	14.8	0.4	28.1	0.5	1	0	1
93	Renal cancer	F	1	1	101	74	150.7	43.5	19.1541	98	59	34.7	60.3	2.88	8	61.9	4.13	0.56				4.87	3.29	1	101	1	1	30.3	92	30.7	334	1	1	0	1	1	13.6	47.8	127	0.0452	9.4	90.6	9.4	0	28.1	0.5	1	0	1
150	Renal cancer	F	1	1	106	46	153	57	24.3496	136	86	43.3	72.4	2.89	6.6	86.5	4.63	1.45				4.57	3.77	1	106	1	2	31.5	83.6	28	335	1	1	1	1	1	14.8	47.6	323	0.0991	15.8	84.2	12.3	3.5	23.7	1.1	1	1	0
144	Renal cancer	F	1	1	112	62	151	54	23.6832	150	69	33.4	54.3	2.72	9.6	61.2	5.11	1.86	2.86	8.24	1.48	5.29	3.48	1	112	0	3	33.1	95	32.1	338	1	0	0	1	1	12.6	46.2	173	0.1002	13.8	86.2	12.6	1.2	29.5	1.3	1	0	0
268	Renal cancer	M	2	0	169	26	170	69	23.8754	133	84	49.5	76.5	2.06	9.9	74.2	4.15	0.94	3.66	8.65	1.44	5.95	5.23	2	169	0	4	47.8	91.4	32.4	354	2	0	0	0	0	12.4	43.1	188	0.1108	7.7	92.3	7.7	0	29.5	2.6	2	0	0
166	Renal cancer	M	2	1	101	32	175	70.8	23.1184	115	72	12.4	27.7	4.37	4.6	112.2	10.15	4.07	2	5.34	2.03	12.33	3.26	2	101	1	1	30	92.1	30.9	335	2	1	0	1	1	15.5	53.1	208	0.0633	13.6	86.4	11.8	1.8	35.4	0.7	2	0	1
34	Renal cancer	M	2	1	121	83	179	95	29.6495	110	62	29.6	58.6	3.85	10.1	69.2	4.2	0.9				6.73	4.55	2	121	0	2	36.5	80.1	26.7	333	2	1	1	1	1	17	52.2	263	0.0509	11.6	88.4	10.5	1.1	24.7	0.6	2	1	1
74	Esophagus malignancy	F	1	0	115	59	165	59	21.6713	102	67	36.6	61.5	3.55	9.7	70.9	5.86	0.66	2.91	8.03	2.57	3.3	3.38	1	115	0	3	33.8	100	33.9	339	1	0	0	1	1	12.2	46	160	0.0439	7.3	92.7	7.3	0	31.5	0.6	1	0	1
178	Esophagus malignancy	M	2	0	138	73	172	85	28.7317	135	76	39	63.3	4.02	16.2	63.6	5.6	1.4	3.54	7.61	1.95	5.85	4.46	2	138	0	3	41.8	93.7	31	330	2	1	0	1	1	12.9	45.8	179	0.036	4.8	95.2	3.4	1.4	27.8	0.6	2	1	1
185	Esophagus malignancy	M	2	0	141	47	178	79	24.9337	112	74	40.5	63.4	4.22	25	83.5	4.76	1.06	2.99	9.46	2.06	6.12	4.19	2	141	0	3	42	100.1	33.5	335	2	0	0	1	1	12.9	48.7	249	0.0578	6.5	93.5	6.5	0	29.6	1.1	2	0	0
203	Esophagus malignancy	M	2	0	146	58						37.2	60.2	2.67	11.3	74	4.46	1.78	3.06	8.26	2.39	4.67	4.39	2	146	0	4	43	98	33.3	340	2	0	0	1	1	12.5	47.1	202	0.0901	7.9	92.1	7.6	0.3	28.6	1.8	2	1	0
67	Esophagus malignancy	M	2	1	85	63	176	53	17.11	106	69	34.1	59.1	2.17	24.7	97.8	2.86	0.89				7.51	2.73	2	85	1	1	23.9	87.5	31	354	2	1	1	0	1	16.4	54	134	0.0412	7.4	92.6	6.8	0.6	30.1	0.4	2	0	1
48	Esophagus malignancy	M	2	1	104	65	158	48	19.2277	110	73	40	62.9	2.18	15	69.8	3.98	0.79	3.63	8.05	2.81	3.13	2.5	2	104	1	1	30.5	122.3	41.6	340	2	0	0	1	1	13.4	61.3	140	0.0427	26.2	73.8	19.1	7.1	43.7	0.7	2	0	1
1	Esophagus malignancy	M	2	1	115	69	170	77.5	26.8166	136	84											6.34	3.62	2	115	0	2	35.2	97.3	31.7	325	2	1	0	1	1	15.4	56.9	149	0.0467	5.4	94.6	4.6	0.8	28.3	0.7	2	1	1
282	Esophagus malignancy	M	2	1	128	64	160	49	19.1406	102	64	35.1	65	5.08	7.2	69.4	3.76	1.41	2.87	9.03	1.32	6.73	3.69	2	128	0	3	37.3	101.1	34.8	344	2	0	0	1	1	13.3	51.1	185	0.0792	10.3	89.7	10	0.3	30	1.3	2	0	0
71	Esophagus malignancy	M	2	1	129	69	170	57	19.7232	134	70	35.8	61.1	4.49	11.5	69	4.32	1.32	3.32	7.65	2.29	7.81	3.84	2	129	0	3	38.1	99.3	33.6	339	2	0	0	1	1	12.4	46.1	313	0.0516	8.2	91.8	8.2	0	30.5	0.8	2	0	1
13	Ureteral malignancy	F	1	1	100	87	150	44.5	19.7778	165	92	36	66.4	3.51	15.8	65.5	4.75	1.57				7.06	3.28	1	100	1	1	29.2	88.9	30.6	344	1	1	0	0	1	14.7	50.1	253	0.0689	7.5	92.5	7.2	0.3	27.9	0.8	1	1	0
16	Ureteral malignancy	F	1	1	104	74	157	58	23.5304	121	89	39.1	78.8	3.09	9.3	60.7	5.39	1.18				3.74	3.65	1	104	1	1	32.3	88.6	28.5	322	1	1	0	1	1	14.1	47.7	121	0.0502	5.2	94.8	5.2	0	25.7	0.6	1	1	1
137	Ureteral malignancy	F	1	1	107	62	163	55	20.7008	138	82	34	64.2	4.88	9.2	49.2	5.33	0.72				7.14	3.88	1	107	1	2	31.8	82.1	27.5	335	1	1	1	1	1	12.8	40.3	309	0.0603	4.8	95.2	4.8	0	24.5	0.7	1	1	1
15	Ureteral malignancy	F	1	1	108	87	157	57	23.1247	136	67	36.2	58.8	2.97	8.4	83.7	3.26	1.33				3.76	3.47	1	108	1	2	31.5	90.9	31.1	342	1	0	0	0	0	14.4	50	166	0.0555	8.6	91.4	8.6	0	30.1	0.7	1	0	1
175	Ureteral malignancy	F	1	1	113	51	148	50.5	23.0551	130	87	30.9	56.1	2.51	6.5	45.9	5.45	3.29	2.66	9.67	3.03	12.55	3.62	1	113	0	3	33.1	91.5	31.4	343	1	0	0	0	0	12.4	43.3	317	0.0676	32.8	67.2	22.7	10.1	29.9	0.9	1	0	0
125	Ureteral malignancy	M	2	1	72	77	175	80	26.1224	121	66	26.3	53.2	4	8.4	153	3.16	1.41	2.49	9.19	2.27	3	2.45	2	72	1	1	21.3	86.9	29.3	337	2	1	1	1	1	18.7	60.8	56	0.0689	16	84	13.4	2.6	34.7	0.6	2	0	1
200	Gastric malignancy	F	1	0	124	58	162	60	22.8624	111	67	39.9	63.9	3.21	11.3	60.4	4.73	0.77				6.43	4.04	1	124	0	3	35.8	88.6	30.7	347	1	1	0	0	1	13.2	44.5	296	0.0542	6.7	93.3	6.7	0	28.6	0.7	1	0	1
216	Gastric malignancy	F	1	0	129	40						44.4	77.3	2.71	8.9	41.9	6.69	2.86	3.54	8.02	1.87	5.96	4.49	1	129	0	4	38.4	85.6	28.7	336	1	1	1	1	1	13.4	43.7	217	0.0894	12.2	87.8	11.5	0.7	27.7	1.3	1	1	0
207	Gastric malignancy	F	1	0	145	60	160	64	25	125	85	41.8	67.2	2.66	15.8	58.1	4.16	2.04	3.08	6.42	4.81	5.54	4.48	1	145	0	4	42.2	94	32.2	343	1	0	0	0	0	13.1	47.1	209	0.0812	9.7	90.3	9.2	0.5	30	1.5	1	0	0
47	Gastric malignancy	F	1	1	61	29	153	45	19.2234	121	61	27.2	53.8	2.63	9.3	55.6	2.99	0.93	2.11	7.26	4	3.38	2.24	1	61	1	1	19.3	86.2	27	314	1	1	0	1	1	15.7	51	177	0.0529	12.3	87.7	11.5	0.8	24	0.4	1	1	1
80	Gastric malignancy	F	1	1	92	74	165	55	20.202	144	75	31.7	55.4	2.81	15.1	63.4	3.8	0.87				4.96	2.87	1	92	1	1	27	94.3	32	340	1	0	0	1	1	12.7	45.4	109	0.0638	14.1	85.9	12.4	1.7	28.6	0.7	1	0	1
147	Gastric malignancy	F	1	1	100	47	150	57	25.3333	118	89	36.9	62.7	2.01	10.7	40.6	5.05	1.67				7.25	3.97	1	100	1	1	30.3	76.2	25.1	329	1	1	1	1	1	16.2	47.4	305	0.0977	23.3	76.7	19.3	4	23.9	1	1	1	0
108	Gastric malignancy	F	1	1	100	77	155	47.6	19.8127	132	79	29.6	56.2	2.25	8.7	52.1	4.39	2.2	2.73	10.95	1.75	4.42	3.51	1	100	1	1	29.3	83.5	28.4	340	1	1	1	1	1	15.1	48.1	265	0.0409	12.3	87.7	10.5	1.8	26.8	0.4	1	1	1
169	Gastric malignancy	F	1	1	105	42	163	53	19.9481	93	73	42.6	72	1.99	12.1	64.5	4.03	0.95				5.67	4	1	105	1	2	32.1	80.2	26.3	328	1	1	1	1	1	12.9	38.7	238	0.0564	10.7	89.3	10.4	0.3	27.3	0.6	1	1	1
83	Gastric malignancy	F	1	1	106	87	158	47	18.8271	132	92	35.7	71.1	5.06	7	76.7	5.7	0.95				5.71	3.54	1	106	1	2	31.6	89.2	30	336	1	1	0	1	1	12.3	41.4	361	0.0534	8	92	8	0	26.8	0.6	1	1	1
33	Gastric malignancy	F	1	1	112	37	155	49.5	20.6035	114	78	40.3	66.8	2.57	6.8	76.5	3.88	1.24	2.84	8.73	1.93	3.24	3.99	1	112	0	3	33.5	84	28.1	334	1	1	1	1	1	12.9	41.7	125	0.0263	4.2	95.8	4.2	0	23	0.3	1	1	1
231	Gastric malignancy	M	2	0	131	62	165	57	20.9366	134	96	34.4	59.3	3.66	7.6	81.8	4.48	0.9				3.34	3.51	2	131	0	3	37.1	105.6	37.2	352	2	0	0	0	0	12.9	52.2	244	0.0356	11.9	88.1	11.9	0	34	0.6	2	0	1
133	Gastric malignancy	M	2	0	132	64	173	60	20.0474	106	57	36.9	59.3	2.17	7.3	86.3	5.58	1.8				3.44	4.45	2	132	0	3	39.3	88.3	29.6	335	2	1	1	1	1	13.4	44.9	193	0.098	5.6	94.4	5.5	0.1	26.4	1.5	2	1	0
197	Gastric malignancy	M	2	0	141	65						38.6	66.3	1.36	11.8	90.6	5.5	3.86				6.18	4.59	2	141	0	3	41.3	90.2	30.8	342	2	1	1	1	1	13.9	47.6	176	0.0682	8.4	91.6	8.4	0	29.1	1.2	2	0	0
236	Gastric malignancy	M	2	0	162	43								2.71								6.03	4.95	2	162	0	4	46.5	94	32.7	348	2	0	0	0	0	12.4	44.6	216	0.0658	7.7	92.3	7.7	0	29.9	1.5	2	0	0
11	Gastric malignancy	M	2	1	66	67	165	58	21.3039	119	64	33.2	62	3.84	9.8	64.1	4.17	1.11				6.37	2.74	2	66	1	1	20.3	73.9	24.1	327	2	1	1	1	1	19.2	53	287	0.0631	26.7	73.3	19.5	7.2	26	0.5	2	1	1
78	Gastric malignancy	M	2	1	71	69	165	63	23.1405	95	62	39.5	63.4	3.68	7.5	88.3	2.53	0.69				5.33	3.33	2	71	1	1	22.7	68.2	21.3	312	2	1	1	1	1	17.6	45.1	332	0.0512	16.3	83.7	12.7	3.6	17.6	0.4	2	1	1
89	Gastric malignancy	M	2	1	89	74	165	45	16.5289	113	64	28	62.1	4.42	7.1	46.4	9.64	1.88	2.64	8.81	2.35	6.96	3.14	2	89	1	1	26.6	84.7	28.2	332	2	1	1	1	1	15.2	49	339	0.0725	33.7	66.3	18.1	15.6	24.9	0.7	2	1	1
44	Gastric malignancy	M	2	1	100	63	172	50	16.901	112	76	26.4	43.8	2.72	6.6	62.2	3.76	1.01				4.4	2.77	2	100	1	1	28.8	103.8	35.9	346	2	0	0	1	1	17.4	70.7	281	0.0552	22.7	77.3	16.6	6.1	33.2	0.7	2	0	1
81	Gastric malignancy	M	2	1	105	58	168	80	28.3447	120	78	36.4	65	1.68	31.3	67.3	3.97	1.73				9.73	3.25	2	105	1	2	29.6	91.1	32.3	354	2	0	0	0	0	13.6	46.5	131	0.0967	15.8	84.2	12.7	3.1	30.4	1.1	2	0	0
14	Gastric malignancy	M	2	1	125	79	170	67	23.1834	125	68	33.9	55.9	3.21	14.9	50.7	3.95	0.94				4.07	3.76	2	125	0	3	36.7	97.5	33.3	342	2	0	0	1	1	12.2	45.1	114	0.0712	8.6	91.4	8.4	0.2	28.7	1.1	2	1	0
26	Intestinal malignancy	F	1	1	101	38	160	53	20.7031	120	64	47.2	72.7	1.78	15	57.8	4.56	0.96				4	4.33	1	101	1	1	31.3	72.3	23.3	322	1	1	1	1	1	14.7	40.8	234	0.0394	6.5	93.5	6	0.5	20.2	0.4	1	1	1
51	Intestinal malignancy	F	1	1	114	76	150	64	28.4444	111	76	32.4	69	4.21	13.5	71.1	3.81	1.3				8.89	4.21	1	114	0	3	35.2	83.7	27.2	324	1	1	1	1	1	14.3	44.4	216	0.0628	13.1	86.9	11.8	1.3	28.6	0.8	1	0	0
176	Intestinal malignancy	M	2	1	89	86	160	51.5	20.1172	140	55	30.1	57	2.39	18.1	78.3	3.97	2.38	2.32	8.74	1.26	5.69	2.69	2	89	1	1	26.3	97.9	33.3	340	2	0	0	1	1	20.3	75.1	41	0.0653	37.8	62.2	19.3	18.5	35.1	0.7	2	0	1
25	Intestinal malignancy	M	2	1	114	52	168	60	21.2585	149	92	36.5	61.6	3.58	22.5	68.6	3.71	1.12				5.48	3.68	2	114	0	2	33.5	91.2	31	340	2	1	0	1	1	14.2	49.7	194	0.086	11	89	9.8	1.2	29.6	1.1	2	0	0
165	Intestinal malignancy	M	2	1	115	67	165	50	18.3655	101	54	32.2	58.9	4.5	8.3	70.4	3.35	1.21	2.89	8.98	0.98	4.2	3.43	2	115	0	2	33.5	97.8	33.5	342	2	0	0	1	1	12	43.8	187	0.0339	7.8	92.2	7.8	0	32.6	0.5	2	0	1
49	Lumbar malignancy	M	2	1	128	65	158	55	22.0317	132	65	36.8	59	2.75	25	79.8	4.42	2.71				6.11	3.72	2	128	0	3	38.3	102.9	34.5	335	2	0	0	1	1	12.5	48	210	0.0693	14.4	85.6	13.1	1.3	36	1.2	2	0	0
161	Pancreatic malignancy	F	1	1	112	21	157	50	20.2848	152	71	35.4	58.4	2.84	11.5	56.2	2.86	0.54				4.99	3.94	1	112	0	3	34.4	87.5	28.5	326	1	1	0	1	1	13.3	43.4	198	0.0515	15	85	13.5	1.5	29.5	0.7	1	0	1
170	Pancreatic malignancy	M	2	1	88	48	174	51.8	17.1093	95	58	26.9	57.8	3.84	14.4	78.4	3.41	1.46				11.9	3.12	2	88	1	1	26.6	85.1	28.1	330	2	1	1	1	1	13.6	43.4	361	0.0559	10.5	89.5	8	2.5	30.5	0.6	2	0	1
141	Pancreatic malignancy	M	2	1	127	60	170	60.5	20.9343	138	84	30.9	55.9	5.57	11	57.5	3.15	0.97				9.57	4.14	2	127	0	3	37.6	90.7	30.7	339	2	1	0	1	1	13.2	46.1	239	0.0535	7	93	6.6	0.4	24.3	0.8	2	1	1
275	Pancreatic malignancy	F	1	0	116	71	157	53.5	21.7047	115	64	34.2	65.8	4.57	22.2	76.1	4.97	1	2.52	14.47	0.31	6.62	3.55	1	116	0	3	33	92.8	32.8	353	1	0	0	0	0	15.2	54.3	109	0.0882	9.7	90.3	9.5	0.2	27.4	1.1	1	1	0
229	Pancreatic malignancy	F	1	0	117	23	168	42	14.881	91	71	39.7	64.8	2.11	13.1	57.1	2.89	0.57				3.39	3.69	1	117	0	3	34.1	92.5	31.8	344	1	0	0	0	0	13.4	47.4	147	0.0365	5	95	5	0	28.3	0.5	1	0	1
228	Pancreatic malignancy	F	1	0	121	76	150	40	17.7778	121	79	36.5	60.1	3.66	183.8	52	6.39	1.48				4.56	3.92	1	121	0	3	33.6	85.8	30.9	360	1	0	0	0	0	14.7	48.7	245	0.0626	6.1	93.9	6.1	0	28.5	0.8	1	0	0
241	Pancreatic malignancy	F	1	0	136	50	160	64	25	132	72	42.3	72.4	3.16	10.8	63.4	4.55	1.1				5.74	4.67	1	136	0	4	39.1	83.7	29	347	1	1	1	0	1	13.2	42.3	303	0.0675	4.3	95.7	4.3	0	27	1	1	1	0
27	Pancreatic malignancy	F	1	1	112	65	156	56	23.0112	109	68	35.3	61.5	4.14	10.3	64	4.4	0.68				3.93	3.69	1	112	0	3	33.3	90.3	30.5	338	1	1	0	1	1	12.8	44.5	154	0.05	3.9	96.1	3.9	0	27	0.6	1	1	1
19	Pancreatic malignancy	F	1	1	112	57	157	57	23.1247	118	71	38.9	60.3	2.37	10.3	66.2	5.85	0.76				4.31	3.63	1	112	0	3	32.7	90.1	31	344	1	0	0	0	0	13.1	44.9	158	0.0635	10.8	89.2	10.4	0.4	28.5	0.8	1	0	0
149	Pancreatic malignancy	M	2	0	130	78	165	63	23.1405	136	82	40.9	66.1	2.79	16.9	60.3	4.77	1.28	2.62	11.06	2.13	4.66	4.48	2	130	0	3	37	82.6	28.9	350	2	1	1	0	1	14.3	45.1	148	0.0728	9.5	90.5	9	0.5	27.6	1	2	1	0
227	Pancreatic malignancy	M	2	0	134	67	161	58	22.3757	135	70	46.3	79	3.66	8.6	72.6	4.81	1.1				4.87	4.34	2	134	0	3	39.1	90.2	31	344	2	1	1	1	1	15	51.9	265	0.0838	12.5	87.5	11.2	1.3	30	1.3	2	0	0
106	Pancreatic malignancy	M	2	1	108	50	165	65	23.8751	160	98	32.9	63.7	3.58	11	132.8	5.62	0.83	2.59	8.85	1.28	5.71	3.56	2	108	1	2	31.9	89.6	30.2	337	2	1	1	1	1	12.8	43.7	250	0.0678	12.2	87.8	10.7	1.5	28.6	0.8	2	1	1
104	Pancreatic malignancy	M	2	1	120	53	175	67	21.8776	131	76	41.9	63.4	4.06	9.5	53.4	5.06	4.59				3.6	3.86	2	120	0	2	33.9	88.1	31	352	2	1	1	0	1	14.5	48	211	0.1832	14.2	85.8	12.6	1.6	29.8	2.3	2	0	0
52	Rectal malignancy	F	1	0	115	73	153	62	26.4855	136	87	36.3	67.7	3.15	14.2	92.4	5.08	1.43	2.5	7.34	1.18	4.1	4.05	1	115	0	3	35.5	87.7	28.4	324	1	1	0	1	1	14	45.8	174	0.0682	11.7	88.3	11.7	0	32.2	0.9	1	0	0
214	Rectal malignancy	F	1	0	124	53	170	70	24.2215	134	75	36	62.5	2.42	7.8	54.5	5.27	1.09	3.49	11.87	1.93	4.98	4.02	1	124	0	3	36	89.6	30.7	343	1	1	0	0	1	12.8	43.9	231	0.0892	6	94	6	0	27.9	1.2	1	1	0
190	Rectal malignancy	F	1	0	130	61	162	59	22.4813	100	74	40.8	66.2	1.9	27.1	44.1	4.81	1.17	2.89	9.48	1.62	6.28	4.25	1	130	0	4	37.8	89	30.6	343	1	1	0	0	1	12.2	41.1	208	0.0574	5.7	94.3	5.7	0	28.2	0.8	1	0	0
263	Rectal malignancy	F	1	0	141	66	161	62	23.9188	129	77	44.3	69.2	2.65	11.8	90.9	5.7	1.21				5.06	5.02	1	141	0	4	41.9	83.4	28.1	337	1	1	1	1	1	14.8	47.2	207	0.0897	5.9	94.1	5.9	0	26.6	1.4	1	1	0
3	Rectal malignancy	F	1	1	78	74	150	61	27.1111	145	78	33.5	65.4	3.1	9.6	104.3	4.3	1.05	2.84	9.53	0.65	4.56	2.77	1	78	1	1	25.1	90.5	28	310	1	1	0	1	1	15	52.2	219	0.0548	12.9	87.1	8.1	4.8	20.1	0.6	1	1	1
31	Rectal malignancy	F	1	1	87	82	152	45	19.4771	129	79	27.8	55	5.94	8	65	4.73	1.27	2.18	6.53	1.37	10.5	2.94	1	87	1	1	26.4	90	29.5	328	1	1	0	1	1	15.4	53.3	408	0.0871	21.8	78.2	17.9	3.9	26.4	0.9	1	1	0
46	Rectal malignancy	F	1	1	105	49	168	58	20.5499	125	82	41.3	73.4	4.34	12	53.1	4.69	0.73	3.38	11.18	1.51	6.99	3.9	1	105	1	2	32.4	82.9	26.9	325	1	1	1	1	1	14.5	44.7	426	0.0513	17.6	82.4	13.4	4.2	26.1	0.6	1	1	1
55	Rectal malignancy	F	1	1	108	78	145	40	19.025	106	53	37.6	63.6	3.51	8	57.8	4.38	1.73				5.86	3.62	1	108	1	2	33.2	91.7	29.7	323	1	1	0	1	1	13.2	45.1	191	0.0609	5.6	94.4	5.6	0	32.4	0.8	1	0	0
60	Rectal malignancy	F	1	1	112	72	156	63	25.8876	137	96	31.8	58.1	1.72	8.4	57.2	3.74	1.25	2.31	7.6	1.43	3.55	3.57	1	112	0	3	33.5	93.7	31.2	333	1	0	0	1	1	12.5	43.8	162	0.0725	10.5	89.5	9.1	1.4	32.9	1	1	0	0
195	Rectal malignancy	M	2	0	132	50						42.6	67.7	2.17	15.8	71.5	5.69	1.51	3.04	8.94	1.04	7.2	4.21	2	132	0	3	38.9	92.4	31.3	338	2	1	0	1	1	12.9	45	285	0.0526	7.9	92.1	7.9	0	29.3	0.8	2	0	1
218	Rectal malignancy	M	2	0	133	47	175	76	24.8163	126	76	36.1	60.5	3.97	16.5	60.9	2.57	1.52	4.92	21.87	0.01	6.02	4.58	2	133	0	3	39.3	85.7	29.1	339	2	1	1	1	1	13.8	45.3	272	0.0471	8	92	8	0	25.5	0.7	2	1	1
249	Rectal malignancy	M	2	0	140	76	151	51.5	22.5867	134	75	37	65	3.36	10.8	117	5.78	1				4.38	4.43	2	140	0	3	40.5	91.4	31.5	345	2	1	0	1	1	14.7	51.6	134	0.0486	6.1	93.9	6.1	0	29.4	0.8	2	0	1
255	Rectal malignancy	M	2	0	150	54	164	60	22.3081	91	70	43.1	68	4.28	11.4	61.9	4.93	1.54	3.8	9.84	2.23	6.74	4.58	2	150	0	4	43.1	94	32.8	349	2	0	0	0	0	12.6	45.2	249	0.0927	5.5	94.5	5.5	0	28.9	1.8	2	0	0
219	Rectal malignancy	M	2	0	155	60	170	65	22.4913	113	73	44	70.9	2.76	12	62.6	4.65	1.01	3.52	8.69	3.83	5.92	4.27	2	155	0	4	45.1	105.7	36.3	343	2	0	0	1	1	12.3	49.9	203	0.079	8	92	7.9	0.1	32.2	1.9	2	0	0
257	Rectal malignancy	M	2	0	158	36	180	81	25	141	72	44.6	67.4	2.98	16.2	77.3	4.3	1.93	4.2	9.69	0.01	8	5.47	2	158	0	4	46.7	85.4	28.9	338	2	1	1	1	1	14.1	46	259	0.0913	3.9	96.1	3.9	0	26.6	1.9	2	1	0
215	Rectal malignancy	M	2	0	160	69	162	66	25.1486	139	89	40.8	63.2	3.05	9.4	65.8	3.76	0.98	3.01	7.52	3.46	6.15	5.1	2	160	0	4	46.4	91	31.5	346	2	1	0	1	1	13.2	45.8	158	0.0549	4.7	95.3	4.7	0	28.2	1.2	2	1	0
217	Rectal malignancy	M	2	0	163	62						47.2	78.2	4.14	13	81.5	6	2.77	4.2	8.89	3.67	8.25	5.32	2	163	0	4	47.4	89.2	30.7	344	2	1	1	1	1	13.1	44.7	308	0.083	8	92	7.9	0.1	28.1	1.9	2	1	0
260	Rectal malignancy	M	2	0	163	66	165	54	19.8347	166	87	38.8	64	3.11	18.8	67.6	4.26	0.8				6.31	5.09	2	163	0	4	46.8	91.9	32.1	349	2	0	0	0	0	12.5	44.1	154	0.0683	4.3	95.7	4.3	0	29.3	1.5	2	0	0
90	Rectal malignancy	M	2	1	118	53	163	64	24.0882	147	95	42.9	79.8	4.1	9.8	66	3.87	1.32	2.87	9.97	1.12	7.58	5.52	2	118	0	2	37.8	68.5	21.4	312	2	1	1	1	1	16.7	43.3	197	0.1085	11.8	88.2	11.6	0.2	20.3	1.2	2	1	0
4	Rectal malignancy	M	2	1	121	59	167	65	23.3067	116	68	37.5	63.9	2.72	12.3	69.1	4.91	2.42	3.48	8.16	3.11	4.5	3.79	2	121	0	2	35.7	94.3	31.8	337	2	1	0	1	1	13.5	48	146	0.0887	10.2	89.8	9.6	0.6	28.3	1.3	2	1	0
101	Rectal malignancy	M	2	1	127	52	170	70	24.2215	130	90	37	65.7	5.98	38.5	77.6	5.66	1.59				5.52	4.01	2	127	0	3	36.5	91.2	31.7	348	2	1	0	0	1	13.1	45.3	221	0.0733	18	82	15.7	2.3	24.3	1	2	1	0
95	Rectal malignancy	M	2	1	128	67	167	60	21.5139	137	91	36.4	60.8	3.24	14.6	91.3	4.4	1.5				4.51	3.9	2	128	0	3	36.5	93.8	32.8	350	2	0	0	0	0	12.3	43.9	197	0.0434	5.7	94.3	5.7	0	28.8	0.6	2	0	1
213	Endometria malignancy	F	1	0	119	39	164	69	25.6544	106	65	38.3	65.4	2.34	5.6	60.6	2.87	0.65				5.33	3.82	1	119	0	3	34.3	89.8	31.1	347	1	0	0	0	0	12.6	43.6	259	0.0502	5.8	94.2	5.8	0	25.4	0.7	1	1	1
245	Endometria malignancy	F	1	0	122	42	150	56	24.8889	135	85	40	64.5	2.33	6.2	46	3.6	1.14	3.15	9.76	1.07	7.87	3.75	1	122	0	3	35.6	95	32.6	343	1	0	0	0	0	12.9	47.2	274	0.0725	6.7	93.3	6.5	0.2	29.4	1	1	0	0
210	Endometria malignancy	F	1	0	125	51	156	54	22.1893	145	96	38.3	25.9	2.42	7.1	52.8	4.51	0.54				3.73	4.37	1	125	0	4	36.2	82.8	28.6	346	1	1	1	0	1	14.1	44.7	182	0.033	6	94	6	0	26.6	0.4	1	1	1
243	Endometria malignancy	F	1	0	133	32	163	51	19.1953	97	62	45	77.2	2.69	11.4	51	4.89	0.67				4.54	4.52	1	133	0	4	38.8	85.7	29.5	344	1	1	1	0	1	12.8	42	265	0.0552	3.4	96.6	3.4	0	25.6	0.8	1	1	0
29	Endometria malignancy	F	1	1	38	47	155	62	25.8065	170	75	37.8	73.5	2.94	10.5	42.2	2.48	0.59	3.35	8.73	1.96	3.96	2.6	1	38	1	1	15.1	57.9	14.6	252	1	1	1	1	1	25.3	55.8	339	0.0798	17.7	82.3	13.7	4	14.2	0.4	1	1	1
116	Endometria malignancy	F	1	1	75	70	160	55	21.4844	117	74	34.2	58.6	3.63	18	62.1	3.41	1.43	2.92	9.5	3.16	4.83	2.66	1	75	1	1	24.4	91.7	28.3	309	1	1	0	1	1	17.6	61.7	110	0.081	19	81	14.5	4.5	24.2	0.8	1	1	0
28	Endometria malignancy	F	1	1	89	47	156	67.2	27.6134	148	73	42.9	67.4	3.24	15.9	48.1	5.74	1.28				6.76	4.37	1	89	1	1	28.2	64.6	20.4	316	1	1	1	1	1	18.9	46.6	311	0.0922	18.2	81.8	15	3.2	18.2	0.7	1	1	1
43	Endometria malignancy	F	1	1	108	42	163	56.9	21.4159	119	75	42.4	67	1.85	8.7	49.7	5.2	2.61				3.61	4.15	1	108	1	2	32.5	78.2	25.9	332	1	1	1	1	1	30.6	91.4	210	0.1115	4.3	95.7	4.3	0	25.8	1.2	1	1	0
102	Endometria malignancy	F	1	1	108	56	155	48.8	20.3122	144	61	36	62.5	3.37	9.8	51.8	5.42	0.75				5.01	3.27	1	108	1	2	30.6	93.6	32.9	352	1	0	0	0	0	13	46.5	119	0.0826	16	84	13.5	2.5	29.5	1	1	0	0
38	Endometria malignancy	F	1	1	109	30	162	52	19.8141	103	75	44.1	72.4	2.72	9.6	45.1	5.55	1.01				6.26	3.83	1	109	1	2	31.8	82.9	28.5	343	1	1	1	0	1	13.8	44.1	319	0.0441	5.4	94.6	5.4	0	26.1	0.5	1	1	1
56	Endometria malignancy	F	1	0	124	59	162	81	30.8642	141	90	41.6	71.1	2.15	8.2	44.8	3.73	1.51	3.37	7.14	1.99	3.99	4.25	1	124	0	3	38	89.4	29.3	327	1	1	0	1	1	13.3	44	175	0.1156	17.2	82.8	13.2	4	30.8	1.7	1	0	0
[truncated: 7 more columns]
